# 1 **MECHANISMS GENERATING CANCER GENOME COMPLEXITY**

## 2 **FROM A SINGLE CELL DIVISION ERROR**

3 Neil T. Umbreit<sup>1,2,3,\*†</sup>, Cheng-Zhong Zhang<sup>4,5,\*†</sup>, Luke D. Lynch<sup>2,3</sup>, Logan J. Blaine<sup>2,3</sup>, Anna M.  
4 Cheng<sup>1,2,3</sup>, Richard Tourdot<sup>4,5</sup>, Lili Sun<sup>8</sup>, Hannah F. Almubarak<sup>4,5</sup>, Kim Judge<sup>6</sup>, Thomas J.  
5 Mitchell<sup>6,7</sup>, Alexander Spektor<sup>2,3,9</sup>, and David Pellman<sup>1,2,3,†</sup>

### 6 **Author Affiliations**

- 7 1. Howard Hughes Medical Institute, Chevy Chase, MD, USA
- 8 2. Department of Cell Biology, Harvard Medical School, Boston, MA, USA
- 9 3. Department of Pediatric Oncology, Dana-Farber Cancer Institute, Boston, MA, USA
- 10 4. Department of Biomedical Informatics, Harvard Medical School, Boston, MA, USA
- 11 5. Department of Data Sciences, Dana-Farber Cancer Institute, Boston, MA, USA
- 12 6. Wellcome Sanger Institute, Hinxton, Cambridgeshire, CB10 1SA, UK
- 13 7. Cambridge University Hospitals NHS Foundation Trust, Cambridge, CB2 0QQ, UK
- 14 8. Single-Cell Sequencing Program, Dana-Farber Cancer Institute, Boston, MA, USA
- 15 9. Department of Radiation Oncology, Dana-Farber Cancer Institute, Boston, MA, USA

16 \*These authors contributed equally to this work

17 †Corresponding authors

18 Correspondence regarding biological experiments and requests for materials should be addressed  
19 to [neilt\\_umbreit@dfci.harvard.edu](mailto:neilt_umbreit@dfci.harvard.edu) and to [david\\_pellman@dfci.harvard.edu](mailto:david_pellman@dfci.harvard.edu)

20 Correspondence regarding sequencing analysis and requests for sequencing data should be  
21 addressed to [cheng-zhong\\_zhang@dfci.harvard.edu](mailto:cheng-zhong_zhang@dfci.harvard.edu)

22

## 23 **ABSTRACT**

24       The chromosome breakage-fusion-bridge (BFB) cycle is a mutational process that  
25 produces gene amplification and genome instability. Signatures of BFB cycles can be observed in  
26 cancer genomes with chromothripsis, another catastrophic mutational process. Here, we explain  
27 this association by identifying a mutational cascade downstream of chromosome bridge formation  
28 that generates increasing amounts of chromothripsis. We uncover a new role for actomyosin forces  
29 in bridge breakage and mutagenesis. Chromothripsis then accumulates starting with aberrant  
30 interphase replication of bridge DNA, followed by an unexpected burst of mitotic DNA  
31 replication, generating extensive DNA damage. Bridge formation also disrupts the centromeric  
32 epigenetic mark, leading to micronucleus formation that itself promotes chromothripsis. We show  
33 that this mutational cascade generates the continuing evolution and sub-clonal heterogeneity  
34 characteristic of many human cancers.

35

## 36 **INTRODUCTION**

37       Cancer genomes can contain thousands of chromosomal rearrangements (*1*).  
38 Traditionally, it was assumed that these genomes evolve gradually by accruing small-scale  
39 changes successively over many generations. However, the extent of genomic rearrangement in  
40 many cancers suggests a non-exclusive, alternative view: these genomes may evolve rapidly via  
41 discrete episodes that generate bursts of genomic alterations (*2-6*). This latter model provides a  
42 parsimonious explanation for the origin of extreme genomic complexity.

43       Three classes of catastrophic events have been described that may account for a substantial  
44 fraction of chromosome alterations in cancer: whole-genome duplication, chromothripsis, and

45 chromosome breakage-fusion-bridge cycles. The first class, whole-genome duplication (WGD),  
46 can promote tumorigenesis and is now appreciated to occur during the development of ~40% of  
47 human solid tumors (2, 7). Whole-genome duplication causes genome instability by several  
48 mechanisms, including doubling the number of centrosomes, distorting spindle architecture,  
49 generating chromosome segregation errors, and producing micronuclei, abnormal nuclear  
50 structures common in cancer (8-11).

51 The second class of catastrophic event, chromothripsis, is a massive rearrangement of only  
52 one or a few chromosomes resulting in an unusual DNA copy number pattern (3, 5, 12).  
53 Chromothripsis occurs with reported frequencies of 20–65% in many common tumor types (1, 13).  
54 We previously found that chromothripsis can originate from micronuclei (14-17), which arise from  
55 mitotic segregation errors or unrepaired DNA breaks that generate acentric chromosome  
56 fragments. Due to aberrant nuclear envelope assembly around these chromosomes, micronuclei  
57 undergo defective DNA replication and spontaneous loss of nuclear envelope integrity, which  
58 results in extensive DNA damage by unknown mechanisms (18, 19).

59 The third class of catastrophic event, the chromosome breakage-fusion-bridge (BFB) cycle  
60 (20, 21), starts with cell division errors that trigger the formation of another abnormal nuclear  
61 structure, a chromosome bridge. Bridges arise from telomere crisis and end-to-end chromosome  
62 fusions but can also occur from end fusions at DNA breaks, incomplete DNA replication, or a  
63 failure to resolve chromosome catenation (22). Bridge breakage then initiates a process that can  
64 generate gene amplification after multiple cell generations. Evidence of BFB cycles has been  
65 reported in a broad range of cancer types, with estimated frequencies ranging up to ~80% in  
66 pancreatic cancer (13).

67           Although BFB cycles are major sources of genome instability, the perfect palindromic  
68   sequence pattern expected from the originally proposed BFB model is not commonly observed in  
69   cancer genomes (*1, 13, 23*). Whether this is due to subsequent chromosomal rearrangement  
70   obscuring the simple BFB pattern, or whether the BFB process itself is inherently more complex  
71   than originally envisioned, has been unclear. Recently, comprehensive cancer genome sequencing  
72   has uncovered examples where signatures of the BFB cycle are intermingled with chromothripsis,  
73   raising the possibility that coupling of these two processes could add complexity to BFB cycles  
74   (*23*). However, to determine the relationship between BFB cycles and chromothripsis, it is first  
75   necessary to better understand the BFB cycle, for which many key mechanistic steps, particularly  
76   how chromosome bridges are broken, remain unclear.

77           Proposed models for chromosome bridge breakage have included breakage by spindle  
78   forces during the mitosis in which they are formed or DNA cleavage by the cytokinesis/abscission  
79   apparatus (*21, 24-26*). Yet recent work indicates that chromosome bridges are rarely, if ever,  
80   broken during mitosis or cytokinesis, but rather persist for many hours into interphase (*26, 27*). It  
81   was then proposed that interphase bridges are severed by the cytoplasmic, endoplasmic reticulum-  
82   associated exonuclease, TREX1 (*26*). Transient nuclear envelope (NE) disruption was suggested  
83   to allow TREX1 to enter the nucleus and gain access to the bridge DNA, simultaneously breaking  
84   the bridge and fragmenting the bridge DNA to generate chromothripsis (*26*). Although the  
85   TREX1-model could explain the association between BFB cycles and chromothripsis in cancer  
86   genomes (*23*), loss of TREX1 was reported to delay, but not block, bridge breakage (*26*).

87           Below, we present data supporting a new model that explains the linkage between BFB  
88   cycles and chromothripsis. Rather than being generated simultaneously by a single mechanism,  
89   we demonstrate that chromothripsis accumulates through a cascade of new mutational events

90 initiated by the formation of a chromosome bridge. The first such event appears to involve  
91 defective DNA replication of bridge DNA, which, in a minority of cells, is associated with a newly-  
92 identified signature of DNA rearrangement in broken bridges during the interphase after bridge  
93 formation. Next, we observed extensive DNA damage and frequent chromothripsis associated with  
94 an unexpected burst of aberrant DNA replication on broken bridge “stubs” during the next mitosis.  
95 Then, because of compromised maintenance of the centromere epigenetic mark, CENP-A, the  
96 chromosomes with the broken bridge stubs mis-segregate with high frequency into micronuclei,  
97 which will generate further rounds of chromothripsis. Analysis of clonal populations after bridge  
98 breakage established that these events initiate iterative cycles of genome instability, causing  
99 extensive subclonal heterogeneity downstream of the formation of a single chromosome bridge.  
100 An analogous series of events was observed after the formation of micronuclei, indicating that  
101 similar mechanisms generate chromothripsis irrespective of the nuclear structure initiating the  
102 mutational cascade. Together, these findings reveal how a single cell division error rapidly  
103 generates extreme genomic complexity.

104

## 105 **RESULTS**

106 We used four methods to generate chromosome bridges to study their breakage and  
107 genomic impact: transient expression of a dominant negative variant of telomeric repeat-binding  
108 factor 2 (TRF2-DN) (28), partial knockdown of condensin (siSMC2) (29), low-dose topoisomerase  
109 II inhibition (ICRF-193) (30), and CRISPR/Cas9-mediated telomere loss on chromosome 4  
110 (Chr4g1, Fig. S1A-C). TRF2-DN was employed to generate chromosome bridges in most  
111 experiments in this study, unless otherwise specified. Chromosome bridges were visualized in  
112 live cells with GFP-BAF (barrier-to-autointegration factor). GFP-BAF is a sensitive reporter for

113 these structures because, unlike histones (26), DNA binding by BAF is not compromised by the  
114 stretching of chromosome bridges during bridge extension (Fig. 1). For TRF2-DN, we developed  
115 transient expression and live-cell imaging conditions that avert the previously reported strong  
116 inhibition of cell cycle progression (26). In our conditions, cells with bridges entered S phase with  
117 similar timing after mitotic exit as unperturbed parental cells lacking bridges (8.3 versus 7.3 hr,  
118 respectively; Fig. S1D and accompanying legend). Importantly, bridges generated by each of the  
119 above four approaches all had similar lifetimes ( $t_{1/2}$ ): ~10 hours from the completion of mitosis  
120 (Fig. 1A).

### 121 **Mechanical force triggers chromosome bridge breakage**

122 The cytoplasmic, endoplasmic reticulum-associated exonuclease, TREX1, has been  
123 suggested to mediate chromosome bridge breakage after rupture of the primary nucleus in bridged  
124 cells, as genetic ablation of TREX1 had a partial effect on bridge resolution (26). However, using  
125 the same cell lines and bridge induction method (and an additional method) but imaging conditions  
126 with less light exposure, we were unable to detect an effect of TREX1 knockout on bridge lifetime  
127 (six independent clones, two different knockout strategies, Fig. S2A-C). Additionally, a notable  
128 fraction of bridge breakage events occurred in the absence of any detectable rupture of the primary  
129 nucleus (36%,  $n = 58$ , Movie S1), and bridge lifetime showed no correlation with the occurrence  
130 or duration of nuclear envelope disruption (Fig. S2D). Therefore, fundamental aspects of the  
131 mechanism for bridge breakage remain to be identified.

132 A clue for alternative mechanisms comes from the fact that as interphase cells migrate in  
133 culture, bridges can reach hundreds of microns in length before breaking, raising the possibility  
134 that bridge breakage might have a mechanical component. Consistent with this idea, BJ foreskin  
135 fibroblasts, which exhibited similar motility to RPE-1 cells (cell velocity 0.48 and 0.51  $\mu\text{m}/\text{min}$ ,

136 respectively), extended and broke chromosome bridges during interphase with similar timing as  
137 bridges in RPE-1 cells ( $t_{1/2} = 7.4$  hr; Fig. S3A and Movie S2). By contrast, two cell lines that  
138 exhibited low motility (HeLa and U2OS) almost never extended bridges beyond 100  $\mu\text{m}$  and rarely  
139 underwent breakage before the next mitosis (10% and 20% interphase breakage, respectively; Fig.  
140 S3B-C and Movies S3-4).

141 We hypothesized that the extension of chromosome bridges is required for their breakage.  
142 To test this idea, we controlled bridge extension using rectangular fibronectin “micropatterns” that  
143 constrain cell migration to the fibronectin-containing pattern (31). When RPE-1 cells were plated  
144 on long (300  $\mu\text{m}$ ) patterns, newly formed chromosome bridges extended to  $\sim 160$   $\mu\text{m}$  on average,  
145 and  $\sim 85\%$  of bridges broke during interphase with similar kinetics as unconfined cells on glass  
146 coverslips (Fig. 1B-C, Movie S5). By contrast, restricting bridge extension with short (100  $\mu\text{m}$ )  
147 micropatterns limited bridge extension to  $< 50$   $\mu\text{m}$  and almost completely blocked bridge breakage  
148 ( $< 10\%$  bridge cleavage prior to entry into the next mitosis; Fig. 1B-C, Movie S6). Although there  
149 was less spontaneous NE rupture on short patterns, increasing NE ruptures  $> 8$ -fold with Lamin B1  
150 knockdown failed to accelerate bridge breakage on short patterns (Fig. S4). Therefore, the  
151 extension of chromosome bridges, but not NE rupture, is required for their breakage.

152 Mechanical forces could stretch a bridge across its length or act locally within a section of  
153 a bridge. Live-cell imaging supported the latter model: bridges often formed acute angle bends  
154 and/or exhibited non-uniform stretching prior to breakage, with one segment appearing taut and  
155 adjacent segments appearing slack, followed by breakage of the bridge within the taut segment (23  
156 of 25 cases examined, Fig. 1D, Movie S7). Supporting the idea that local actomyosin contractile  
157 forces contribute to bridge breakage, live cell imaging with the actin reporter RFP-Utr261 (32)  
158 revealed large concentrations of actin filaments immediately adjacent to the taut segments of the

159 bridge just prior to breakage in all cases examined ( $n = 30$ ; Fig. 1E, Fig. S5A, Movies S8-9 and  
160 see (27) for similar results). Actin accumulation was transient and dissolved after bridge breakage.  
161 Immunostaining to detect paxillin revealed large focal adhesions at sites of F-actin accumulation  
162 where bridges appeared taut, indicating strong cell-extracellular matrix attachments (Fig. 1F).  
163 These sites also had extensive accumulations of non-muscle myosin II, which co-stained for the  
164 active, phosphorylated form of myosin regulatory light chain, indicating high contractile forces  
165 (Fig. 1G). Local myosin accumulation and contractility is known to be induced by increased  
166 membrane tension (33), which is expected to occur at the base of extending chromosome bridges.

167 We next asked if actomyosin contractility is required for chromosome bridge breakage.  
168 During live imaging, chromosome bridges were generated and allowed to extend, and then small-  
169 molecule inhibitors of myosin activation (ML7) or actin assembly (Latrunculin A) were added. By  
170 comparison with controls, ML7 addition substantially delayed, and Latrunculin A addition  
171 abolished, bridge breakage (Fig. 1H, Fig. S5B, and Movie S10) demonstrating that a functional  
172 actomyosin network is required for bridge breakage. Moreover, when cells were plated on  
173 fibronectin, which increases focal adhesions and intracellular actomyosin contractile forces (34),  
174 bridge breakage was accelerated two-fold ( $p < 0.0001$ ; Fig 1I). Because fibronectin also affects  
175 cell signaling (35, 36), we plated cells on hydrogels of varying stiffness, all coated with the same  
176 concentration of fibronectin. Consistent with the known effect of reduced substrate stiffness  
177 diminishing actomyosin contractility (37), bridge lifetime increased with decreasing substrate  
178 stiffness (Fig. 1J). Finally, we asked whether bridge breakage depends on the LINC complex, the  
179 best characterized pathway by which actomyosin forces can be transmitted across the nuclear  
180 envelope (38-40). Knockout of the major inner nuclear membrane LINC components, SUN1 and  
181 SUN2, had a partial effect, delaying bridge breakage ( $t_{1/2} = 18$  hr; Fig 1K and Fig. S6). Together,



182 these data establish a critical role for cytoplasmic actomyosin contractile forces in chromosome  
183 bridge breakage.

184

### 185 **Single-cell sequencing reveals the immediate impact of chromosome bridge breakage**

186 *Copy number alterations immediately after bridge breakage.* We investigated both the  
187 immediate and long-term consequences of chromosome bridge breakage on genome structure. To  
188 define the immediate outcome(s) of bridge breakage, we employed our previously developed  
189 approach, which combines live-cell imaging with single-cell whole-genome sequencing [Look-  
190 Seq (*17*)]. Chromosome bridges were induced, their breakage was monitored by live-cell imaging,  
191 and the two daughter cells were isolated ~8 hr after bridge breakage for single-cell whole genome  
192 sequencing. Sequencing was performed to ~25× mean depth, which allowed us to interrogate  
193 ~90% of the unique sequence of each homologous chromosome with one or more reads (Fig. 2A,  
194 Methods). This approach enabled us to observe the immediate consequences of bridge breakage  
195 without confounding genomic alterations during subsequent cell divisions.

196 In all 20 cell pairs after bridge breakage, we observed copy number alterations affecting a  
197 segment (>2.5 Mb) of one or more chromosome arms, distributed in a reciprocal pattern between  
198 the daughter cells (Fig. 2B, Fig. S7, and Movies S11-13). Using previously developed haplotype  
199 copy number analysis, we could unambiguously identify the homologous chromosome that  
200 underwent breakage (*17*). Most commonly, we found terminal segment reciprocal gain and loss  
201 patterns, which, as in the original BFB model (*21*), are expected from breakage of dicentric fusions  
202 between sister chromatids or single chromatids from different chromosomes (“chromatid fusions,”  
203 Fig. 2C). Interestingly, in four daughter cell pairs, we observed the reciprocal gain and loss of  
204 internal chromosome segments. This pattern can be explained by breakage of replicated dicentric

205 chromosomes derived from two different chromosomes (“chromosome fusions,” (41), Fig. 2D),  
206 coupled to an inverted orientation of the dicentric chromatids along the mitotic spindle. Although  
207 bridge breakage sometimes affected only one chromosome, in nine cases, two or more different  
208 chromosomes were involved, as expected from the methods employed to induce bridges (41); the  
209 exception was the CRISPR-based method, which, as expected, exclusively produced chromosome  
210 4 bridges (Fig. 2B).

211 Closer inspection of the bridge breakpoints revealed a spectrum of genomic outcomes,  
212 where some bridges underwent simple breakage and others experienced fragmentation, which was  
213 specifically localized to the region of the main copy number transition (Fig. 3). In cases where  
214 bridge breakage occurred with local fragmentation, fragments as small as ~100 kb could be readily  
215 detected (see Methods for details) if these fragments were retained within a larger region of  
216 complete haplotype loss. The retention of larger (~1Mb) fragments in one daughter could also be  
217 validated by reciprocal loss of this fragment in the sister cell. Rearrangements involving fragment  
218 ends often provided additional support for the identification of fragmentation.

219 Importantly, both simple breaks and local fragmentation could be generated by mechanical  
220 force-dependent bridge breakage, because direct breakage of bridges with a glass capillary yielded  
221 a very similar spectrum of outcomes (Fig. 4A and Fig. S8A). Moreover, we observed similar local  
222 fragmentation patterns for spontaneous bridge breakage in TREX1-null cells, reinforcing the  
223 conclusion that TREX1 is not required to break or fragment chromosome bridges (Fig. 4B and Fig.  
224 S8B).

225 In sum, these findings demonstrate that the immediate consequences of bridge breakage  
226 are relatively simple patterns of copy number alterations localized to the bridge. This localized  
227 pattern contrasts with that reported from bulk sequencing of populations of cells isolated many

228 generations after telomere crisis. These populations often contained complex copy number  
229 oscillations and rearrangements that encompassed most of a chromosome arm and/or spanned the  
230 centromere (26). We also observed these complex patterns in long-term population evolution  
231 experiments and will present evidence defining a cascade of events downstream of initial bridge  
232 breakage that can explain them (see Figs. 7-9 below).

233 *Chromosome rearrangements associated with bridge breakage.* We next analyzed  
234 chromosome rearrangements associated with the above described DNA copy number alterations.  
235 Many cell pairs exhibiting simple breakage or small-scale fragmentation contained the  
236 approximate number of rearrangements expected from ligation of the fragments (Fig. 3B). This  
237 pattern of rearrangements closely resembles what has been termed “local jump footprints,” a  
238 rearrangement signature in cancer genomes of unknown origin (42). We also identified several  
239 examples of local fragmentation involving two or more chromosomes, where subsequent end-  
240 joining produced a pattern of intra- and inter-chromosomal rearrangements (Fig. 3C, bottom cell).  
241 Overall, these findings suggest that “local jumps” can be generated by DNA ligation after local  
242 fragmentation, and thus may share a common underlying mechanism with many cases of  
243 chromothripsis, consistent with our previous proposal (17).

244 Four daughter cell pairs showed a distinct and particularly extreme pattern of complex  
245 rearrangement ( $n = 4$  of 20 cell pairs; Fig. 5A). In two of these cases we additionally observed  
246 kataegis near the rearrangements. Kataegis is a phenomenon in which local clusters of point  
247 mutations are generated in a strand-coordinated manner and in trinucleotide contexts implicating  
248 the action of APOBEC family cytosine deaminases on single-stranded DNA (Fig. S9) (43, 44).  
249 Thus, complex rearrangements and kataegis can occur at or around the time of chromosome bridge  
250 breakage, albeit in a minority of cases.

251 Analysis of rearrangement junctions from these four samples revealed surprising features  
252 that are inconsistent with an origin from simple fragmentation followed by ligation in random  
253 order and orientation. Instead, the rearrangement pattern suggests it originates from errors during  
254 DNA replication. First, rather than being randomly distributed, in these samples, breakpoints were  
255 tightly clustered into local hotspots, as has been previously noted in chromothripsis samples but  
256 not understood mechanistically (45). Second, tracking the connections between rearrangements  
257 revealed chains of short insertions (median 183 bp) that were arrayed in tandem, hereafter referred  
258 to as “Tandem Short Template” (TST) jumps (Fig. 5B). The TST insertions were typically derived  
259 from multiple hotspots on chromosomes within the bridge, but occasionally, insertions originated  
260 from other chromosomes not involved in the bridge. One plausible explanation is that these  
261 insertions were generated by template-switching DNA replication errors, as in the  
262 microhomology-mediated break-induced replication (MMBIR) model (12, 46).

263 Accordingly, we analyzed microhomology at the junctions between TST insertions.  
264 Although a minority of junctions showed blunt-end joining ( $\leq 1$  bp microhomology), junctions with  
265 microhomology were also infrequent. For example, of the 13 junctions in the TST chain shown in  
266 Fig. 5B, five contained microhomology or insertion of  $\leq 1$  bp, and two showed  $\geq 2$  bp  
267 microhomology. The remaining six junctions contained 2–20 bp of sequence with ambiguous  
268 origin. It is possible that these sequences reflect junctional microhomology, but that detection of  
269 microhomology is obscured because the sequences are derived from repeats and/or partial  
270 mismatches that are difficult to map (47).

271 In light of the above findings implicating aberrant DNA replication in the generation of the  
272 TST jump signature, we characterized the efficiency of DNA replication in chromosome bridges.  
273 Pulse-labeling with the nucleoside analog, 5-ethynyl-2'-deoxyuridine (EdU) was used to assess

274 replication in chromosome bridges. Cells in S phase labeled strongly for EdU in the primary  
275 nucleus, but EdU intensity dropped off where chromatin extruded from the main nucleus and was  
276 absent from most of the bridge (Fig. 5C). Control experiments demonstrated that the absence of  
277 EdU signal was not due to limited detection sensitivity for the small amount of DNA in bridges  
278 (Fig. S10). The same defect was observed in intact bridges and broken bridge stubs (Fig. 5C),  
279 indicating that both structures have replication defects. Further support for the conclusion that  
280 bridge DNA is poorly replicated came from our single-cell sequencing experiments. In  
281 approximately half of the daughter cell pairs, we could identify a region of the bridge chromosome  
282 that was present at lower copy number than the intact homologue that was not in the bridge (Fig.  
283 5D). Therefore, chromosome bridges exhibit severe DNA replication defects similar to those  
284 previously identified in micronuclei (14, 16, 19).

285 We observed the TST jump signature in two additional contexts by bulk DNA sequencing.  
286 First, we identified the TST jump signature by bulk sequencing of a population of cells derived  
287 from a single cell with a broken bridge. We use CRISPR to induce breakage of the termini of  
288 Chr4, observed the formation and breakage of chromosome bridges and then isolated individual  
289 cells that were then grown into large populations ( $>10^6$  cells each). One out of 12 such populations  
290 evidenced clustering of rearrangements into breakpoint hotspots, with chains of short insertions  
291 with a similar size range as the single cell experiments (Fig. 6A). Second, we identified the TST  
292 jump signature by long-read sequencing of a primary tumor sample obtained from a patient with  
293 renal cell carcinoma. In this patient sample, the TST jumps are associated with a chromothripsis  
294 event that generated the unbalanced translocation between Chr3p and Chr5q (Fig. 6B), which is  
295 the canonical driver event in this cancer type (48). The median size of the insertions (199 bp) was  
296 similar to what we observed by single-cell sequencing of broken bridges (Fig. 6C). These findings

297 indicate that the TST jump signature reflects a specific mutational process that can be stably  
298 inherited over many generations.

299 In summary, sequencing cells after the breakage of chromosome bridges demonstrates that  
300 most rearrangements result from ligation after localized fragmentation but that highly complex  
301 rearrangements do occur in a minority of cases. The unique sequence features of these  
302 rearrangements (TST jumps) suggest an origin from template-switching errors in DNA replication  
303 (*12, 47, 49, 50*).

304

### 305 **Mechanisms generating DNA damage downstream of chromosome bridge breakage**

306 *Damage from aberrant mitotic DNA replication.* Although there is a low frequency of  
307 complex rearrangement initially associated with chromosome bridges in the first interphase after  
308 the bridge has formed, we hypothesized that additional DNA damage might arise downstream of  
309 bridge breakage. First, chromosome bridges contain segments of incomplete DNA replication and  
310 probably stalled replication forks that could undergo replication fork breakage upon entry into  
311 mitosis (*51, 52*). Second, we found that complex rearrangements were frequent in the second  
312 generation (i.e. grand-daughter cells) derived from cells with the stubs of broken chromosome  
313 bridges. In all three of the second-generation lineages that we examined by single-cell sequencing,  
314 we detected complex rearrangements localized near the bridge breakpoints (Fig. S11). These  
315 considerations motivated experiments to determine if the broken stubs of chromosome bridges  
316 acquire additional damage upon entry into the next mitosis.

317 We assayed DNA damage in mitosis using a protocol of live-cell imaging followed by  
318 fixation and staining for  $\gamma$ -H2AX in these same cells. Relative to primary nuclei, most broken  
319 bridges exhibited little to no detectable damage during interphase, even when cells were held in

320 extended G2-arrest with CDK1 inhibition. However, if cells with broken bridge stubs were  
321 released into mitosis,  $\gamma$ -H2AX labeling intensity increased ~5-fold (Fig 7A-B). This damage was  
322 localized to one or a few mitotic chromosomes and was observed only in cells that had a bridge in  
323 the prior interphase (Fig 7A). Heavy mitotic  $\gamma$ -H2AX labeling was consistently associated with  
324 extensive replication protein A (RPA) accumulation, indicating the generation of single-stranded  
325 DNA (ssDNA) (Fig. 7A-B). Surprisingly, pulse-labeling with EdU revealed that RPA and  $\gamma$ -H2AX  
326 accumulation coincided with extensive DNA synthesis that occurred specifically on the bridge  
327 DNA during mitosis (Fig. 7C). Similar findings were obtained in BJ cells with bridges induced by  
328 topoisomerase inhibition (Fig. S12). Live-cell imaging of GFP-RPA2 established that the mitotic  
329 replication specifically occurred on the stub of the broken chromosome bridge (Fig. 7D and Movie  
330 S14). Therefore, the stubs of broken chromosome bridges undergo a second wave of DNA damage  
331 during a burst of aberrant, mitosis-specific DNA replication.

332 *Chromosome bridges generate micronuclei.* If chromosome bridge formation generated  
333 micronuclei, the frequency of chromothripsis and the size of the rearrangement footprint would be  
334 further increased (14, 17). This could contribute to the extensive pattern of rearrangements  
335 previously reported by bulk sequencing of cell clones derived after telomere crisis (26).

336 Although it has been previously reported that there is no increase in the frequency of  
337 micronuclei immediately after chromosome bridge breakage (26), whether the resulting broken  
338 chromosomes segregate normally in subsequent cell divisions has not been examined. To address  
339 this question, we used live-cell imaging to track these chromosomes over two generations (Fig.  
340 8A). We confirmed that micronucleation is not an immediate consequence of chromosome bridge  
341 breakage in the first cell cycle when the bridge forms and breaks. However, a different result was  
342 obtained when we examined daughter cells with broken bridges that went through the next mitosis:

343 52% of divisions resulted in grand-daughter cells with micronuclei (n = 82 daughter cell divisions  
344 examined; Fig. 8A and Fig. S13A). This frequency was higher still when the bridge did not break  
345 during the first cell division (65%, n = 20). By comparison, cells without a bridge divided normally  
346 and did not produce micronuclei (n = 82 divisions), even though they were present in the same  
347 imaging dish and were treated identically. BJ cells induced to form bridges by topoisomerase  
348 inhibition also showed an increase in micronucleation rate (>5 fold) in the second cell cycle (Fig.  
349 S13A). Therefore, micronucleation is a major downstream consequence of chromosome bridge  
350 formation.

351 To determine whether the above described micronuclei contain chromosomes from  
352 bridges, we generated CRISPR-mediated Chr4 bridges and used fluorescence in situ hybridization  
353 (FISH) to detect DNA from Chr4 (Fig. 8B). In the first cell cycle after induction, almost all bridges  
354 contained Chr4 sequence (Fig. S1C). Chr4 centromeres (CEN4) sometimes localized to the “base”  
355 of the bridge, with some CEN4 spots appearing stretched, suggesting that they were under  
356 mechanical tension (Fig. 8B). In the second cell cycle, most micronuclei contained DNA from  
357 Chr4 (80%, n = 105), indicating that the majority of chromosomes from bridges mis-segregate in  
358 the next mitosis. Surprisingly, most of these micronuclei contained CEN4 DNA (62%, n = 84),  
359 indicating that the high rate of mis-segregation cannot be explained by loss of centromeric DNA.  
360 As most bridge-derived micronuclei exhibited little or no staining for CENP-A (Fig. S13B), it  
361 appeared that the functionality of centromeres trapped within bridges might be compromised.

362 Defective loading of CENP-A, presumably due to nuclear import defects, could contribute  
363 to centromere defects in chromosome bridges, as was recently reported for micronuclei (53).  
364 However, failure to load new CENP-A would only cause a 2-fold dilution each cell cycle, which  
365 on its own (54) would be unlikely to explain the timing and extent of chromosome mis-segregation



366 we observed. This frequent mis-segregation suggested a more severe defect, perhaps due to active  
367 stripping of previously loaded CENP-A from the centromeres of bridge chromosomes. To address  
368 this possibility, we pulse-labeled cells expressing Halo-tagged CENP-A from its endogenous locus  
369 (55) prior to the induction of chromosome bridges, enabling preferential visualization of the  
370 preexisting population of CENP-A that was loaded prior to bridge formation. After labeling and  
371 bridge induction (TRF2-DN), cells were given sufficient time to divide twice—first to form  
372 bridges, and again to allow bridges to be converted to micronuclei (Fig. 8C). We then measured  
373 CENP-A levels at centromeres in micronuclei and determined that they were reduced ~4-fold  
374 relative to the primary nucleus, with ~25% of micronuclear centromeres lacking any detectable  
375 CENP-A (Fig. 8C). By contrast, in control micronuclei induced by nocodazole washout, CENP-A  
376 levels were only ~1.5-fold reduced using the same labeling strategy (Fig. S13C), as expected from  
377 defective CENP-A loading alone. Therefore, chromosomes in bridges are prone to CENP-A  
378 depletion, which likely compromises centromere identity, leading to frequent micronucleation and  
379 additional chromothripsis.

380

### 381 **Common mechanisms for DNA damage in micronuclei and chromosome bridges**

382 We hypothesized that chromosome bridges and micronuclei, although morphologically  
383 distinct, might nevertheless have a similarly defective nucleoplasm leading to similar defects in  
384 DNA replication—both during interphase and then later in mitosis. This idea was motivated by  
385 our previous work showing that the replication defect in micronuclei stems from aberrant nuclear  
386 envelope assembly and defective nucleo-cytoplasmic transport (19). Chromosome bridges share  
387 this same defect in nuclear envelope assembly (19).

388 We determined if micronuclei acquire DNA damage during interphase like chromosome  
389 bridges. Because nuclear envelope disruption itself causes DNA damage (18), we characterized  
390 micronuclei with intact nuclear envelopes. Micronuclei were generated by a nocodazole washout  
391 procedure (17) and EdU labeling was used to assess the extent of DNA replication in micronuclei  
392 relative to the primary nucleus (Fig. 9A). Intact micronuclei were identified by their accumulation  
393 of a nuclear import reporter (RFP fused with a nuclear localization signal, RFP-NLS) (17). As  
394 expected, many micronuclei in G2 cells had detectable, but strongly reduced DNA replication  
395 relative to the primary nucleus (median EdU ratio = 27%). In these G2 cells, 23% of intact  
396 micronuclei displayed DNA damage (Fig. 9A-B). Interestingly, almost all DNA damage occurred  
397 in micronuclei with the strongest replication defect, as 90% of damaged micronuclei were at or  
398 below the median EdU level (27% of the primary nucleus signal, Fig. 9A-B). Furthermore, nearly  
399 all DNA damage in intact micronuclei could be eliminated by blocking the initiation of DNA  
400 replication with small molecule inhibitors of either cyclin-dependent kinase (CDK) or Dbf4-  
401 dependent kinase (DDK) (Fig. 9A-B). We note that although  $\gamma$ -H2AX intensity measurements  
402 were reliable for assessing DNA damage in micronuclei, similar measurements are not feasible for  
403 chromosome bridges because of the tension-induced nucleosome loss that occurs on bridge  
404 chromosomes (26). Single-cell sequencing showed extensive chromothripsis-like rearrangements  
405 in one of ten G2 cells with intact micronuclei (Fig. 9C). Thus, like chromosome bridges, intact  
406 micronuclei undergo defective DNA replication in interphase during the first cell cycle after their  
407 formation, leading to a low frequency of DNA damage and chromothripsis.

408 We next asked if micronuclear chromosomes, like broken chromosome bridges, undergo  
409 mitotic replication and secondary DNA damage. Although most intact micronuclei in G2 cells  
410 lacked DNA damage, after entering mitosis, there was a ~10-fold increase in damage levels on

411 micronuclear chromosomes, accompanied by mitotic DNA synthesis and the accumulation of  
412 ssDNA (Fig. 9D-F, Fig. S14A, and Movie S15). These findings were corroborated in BJ and HeLa  
413 cells (Fig. S14B).

414 We used single-cell sequencing to determine if transit through mitosis promotes complex  
415 rearrangement of micronuclear chromosomes. By live-cell imaging, we identified cells with intact  
416 micronuclei that subsequently went through mitosis, generating daughter cells. Unlike the parental  
417 G2 cells where only one of ten cells exhibited chromothripsis (Fig. 9C), we observed  
418 chromothripsis in eight of the nine daughter pairs after passing through mitosis (Fig. 9G and Fig.  
419 S15). Thus, incompletely replicated chromosomes from either micronuclei or bridges undergo  
420 aberrant replication upon entry into mitosis linked to a high frequency of complex rearrangement  
421 in the next generation.

422 Therefore, at a low frequency, DNA from chromosome bridges or micronuclei undergo  
423 fragmentation and rearrangement during defective DNA replication in interphase. Subsequently,  
424 a second wave of abnormal replication and heavy DNA damage occurs when cells enter mitosis.  
425 For chromosomes bridges, DNA damage and chromothripsis is further amplified by the induction  
426 of micronuclei.

427

## 428 **Complex genome evolution from the formation of a chromosome bridge**

429 Our results identify a cascade of events that should amplify both the frequency and extent  
430 of chromosomal aberrations downstream of chromosome bridge formation. These findings predict  
431 that the formation of a chromosome bridge should initiate ongoing genome instability where  
432 episodes of chromothripsis would necessarily accompany breakage-fusion-bridge cycles (3, 56).

433 To more directly test our model, we induced the formation of CRISPR-generated Chr4  
434 bridges as discussed above, enabling us to track the evolution of the bridge chromosome in a long-  
435 term population growth assay. Bulk genome sequencing analysis of 12 such populations (hereafter  
436 “primary clones”) revealed copy number alterations that affected one or both copies of Chr4 in  
437 every primary clone (Fig. 10A, Fig. S16). Only one primary clone showed simple breakage of  
438 Chr4, whereas the remainder showed complex copy number patterns and rearrangements: seven  
439 primary clones had complex copy number alterations confined to one arm of Chr4, and four  
440 exhibited alterations of both Chr4 arms (Fig. S16).

441 Across all 12 primary clones, there were 26 additional karyotype abnormalities (copy  
442 number alterations and/or chromosome fusions) affecting a total of 8 different non-targeted  
443 chromosomes (Table S1). Interestingly, these fusions primarily involved acrocentric chromosomes  
444 (85% of cases), which were typically seen fused at their p-arms to the aberrant Chr4 (Fig. S17). A  
445 similar enrichment of acrocentric fusions has been reported previously in samples after TRF2-DN  
446 expression (57), so this effect is unlikely to be an off-target artifact of the CRISPR-generated Chr4  
447 bridge system. These results suggest that broken chromosome ends might be more likely to fuse  
448 with acrocentric chromosomes whose terminal rDNA repeat sequences are fragile and prone to  
449 spontaneous breakage (58). The high frequency of acrocentric fusions may also be explained by  
450 selection, as they provide an efficient path to stabilize broken bridge chromosomes by supplying  
451 a single functional centromere and telomere. Importantly, the non-Chr4 aberrations were typically  
452 subclonal within each primary clone (Table S1), suggesting their occurrence during downstream  
453 evolution of the initial bridge involving Chr4.

454 Multiple additional lines of evidence indicated a high degree of ongoing genome instability  
455 within most of the primary clones, including (i) high frequencies of micronuclei and chromosome

456 bridges (not shown); (ii) non-clonal aberrations of Chr4 observed by cytogenetic analyses (Table  
457 S1 and Fig. S17); and (iii) non-integer copy number states in the bulk sequencing data, indicating  
458 subclonal copy number heterogeneity (Fig. 10A, Fig. S16, and Fig. S18). Subclonal heterogeneity  
459 was directly validated with low-pass sequencing followed by DNA copy number analysis on  
460 ~500–800 single cells from each of nine primary clones (Fig. 10B and Fig. S19). This  
461 heterogeneity primarily occurred on Chr4, but was also evident on acrocentric Chrs 13, 14, 15, and  
462 22 at lower penetrance (Fig. 10B and Fig. S19).

463 To better understand the evolution of copy number variation, we derived subclones from  
464 the primary clones, and performed bulk whole-genome sequencing (Fig. 10C-D). These data  
465 provided clear evidence for complex copy number alterations and rearrangements occurring  
466 downstream of the initial bridge breakage event. Three representative subclone copy number  
467 profiles, shown in Fig. 10C, illustrate a shared ancestral breakpoint near the Chr4 p-arm terminus  
468 (dotted black line), as well as additional breakpoints specific to each lineage (dotted blue lines).  
469 The breakpoints private to each lineage cannot be explained by an early rearrangement event with  
470 subsequent loss in some subclones. Instead, these breakpoints can only have been acquired after  
471 the ancestral break.

472 Other examples provided evidence for least three modes of ongoing genome evolution in  
473 the primary clone. First, we observed kataegis in 22 of 23 subclones derived from primary clone  
474 1a; however, only a few of these kataegis events were shared across the entire set of subclones  
475 (Fig. S20). Most kataegis events were identified only in particular lineages or were even private to  
476 just one subclone, which is best explained by some kataegis events occurring late in the evolution  
477 of the population (Fig. S20). Second, as shown by the analysis of subclones from one primary  
478 clone in Fig. 10D, one homolog (homolog A) exhibited shared breaks as well as private focal

479 changes, including amplifications, which varied in both magnitude and location across the  
480 different subclones. Third, in other subclones from this experiment that all share a common  
481 homolog A profile, we observed variable loss of the p-arm terminus for homolog B in a pattern  
482 suggestive of progressive shortening. This finding, together with our observation that one  
483 subclonal lineage exhibits an intact homolog B profile (Fig. 10D bottom), indicates that the  
484 evolution of homolog B occurred late during growth of the primary clone and postdated the  
485 alterations that gave rise to their shared homolog A profile.

486         The apparent progressive shortening of homolog B in Fig. 10D likely reflects ongoing BFB  
487 cycles. The absence of cells with gain of this region, as predicted by the BFB model, may be  
488 explained by gene amplification compromising the fitness of these cells, and/or a bias towards  
489 segmental loss due to under-replication of bridge DNA (Fig. 5C-D). This progressive pattern of  
490 terminal segment loss generates a sloping average copy number level in the bulk sequencing data  
491 (Fig. 10D, homolog B). This pattern is present in most of our primary clones (Fig. S18), and is  
492 also commonly observed in cancer genomes (C.Z. Zhang, unpublished). The pattern may therefore  
493 represent a useful sequence-based biomarker for ongoing genome instability.

494         In summary, our results demonstrate that the formation and breakage of a chromosome  
495 bridge initiates a cascade of events that rapidly generate a high degree of genomic complexity and  
496 cellular heterogeneity. Because later genome evolution obscures the initial genomic alterations,  
497 elucidating early events requires a combination of live-cell imaging and single cell genomic  
498 analysis (Look-Seq), enabling a direct correspondence to be established between the phenotype of  
499 a cell division error and its genomic consequences.

500

## 501 **DISCUSSION**

502 Our results identify a cascade of events that generate increasing amounts of chromothripsis  
503 after the formation of a chromosome bridge. These findings substantially revise the chromosome  
504 breakage-fusion-bridge model (21, 59, 60) and establish that episodes of chromothripsis will be  
505 inherently interwoven with BFB cycles, explaining the implied association between these  
506 processes in cancer genomes.

507 We propose the following model (Fig. S21). Like micronuclei, nuclear envelope assembly  
508 around chromosome bridges is aberrant, leading to a depletion of nuclear pores (19) and a defective  
509 nucleoplasm. This results in poor DNA replication in the bridge, including stalled replication forks  
510 and replication origins that have not fired. The bridge is then broken by a mechanism that requires  
511 stretching force from the actin cytoskeleton. Bridge breakage produces simple breaks and local  
512 fragmentation, generating free DNA ends that can engage in end-joining and/or in error-prone  
513 replicative repair, potentially MMBIR (12, 46). In some cells, this produces the rearrangement  
514 signature that we term Tandem Short Template (TST) jumps. These events lead to a low frequency  
515 of chromothripsis during the interphase when the bridge forms and breaks. Subsequently, after  
516 cells enter mitosis, the stubs of broken chromosome bridges undergo a burst of aberrant mitotic  
517 DNA replication, similar to what occurs for micronuclear chromosomes. This leads to significantly  
518 more DNA damage and increases the frequency of chromothripsis. Finally, bridge formation  
519 disrupts the centromere histone epigenetic mark, compromises centromere function and thereby  
520 increases the rate of micronucleation during the next cell division after bridge formation. These  
521 micronuclei generate further cycles of chromothripsis, as previously described (15, 17). Combined,  
522 these mutational events rapidly generate hallmark features of cancer genome complexity,

523 producing continuing cycles of genome evolution and subclonal heterogeneity from a single cell  
524 division error.

525

## 526 **Mutagenesis and DNA fragmentation from actomyosin-based force**

527 It was previously proposed that bridge breakage might occur by mechanical forces  
528 generated during chromosome segregation in mitosis (21), cytokinetic furrow ingression, or  
529 abscission (24, 25). However, recent findings (26) and our own observations indicate that most  
530 bridges remain intact throughout mitosis, cytokinesis, and abscission, arguing against a major role  
531 for these processes in bridge breakage. This work suggested that bridges are cleaved enzymatically  
532 via a mechanism partially dependent upon the cytoplasmic, endomembrane-associated  
533 exonuclease TREX1 (26). Our data disfavor a role for TREX1 and, instead, demonstrate that  
534 bridge breakage requires mechanical forces from interphase actomyosin-based contractility (Fig.  
535 1). These forces appear to be exerted locally on DNA near the base of the bridge and are associated  
536 with transient actin accumulation and large focal adhesions. This actin accumulation may be  
537 triggered by plasma membrane tension, consistent with well-described force-response properties  
538 of cytoskeletal contractility (37, 61, 62). Actomyosin forces are transmitted across the nuclear  
539 envelope to the bridge chromatin in part by the LINC complex (38, 40).

540 A simple interpretation of our results is that actomyosin-dependent forces are capable of  
541 rupturing the phosphodiester bonds in bridge DNA. The force required to break DNA is estimated  
542 to be in the range of 0.5–2 nN (63, 64), which can be achieved or exceeded by traction forces  
543 generated from individual focal adhesions, which range from 2~20 nN (37, 65-67). Although non-  
544 covalent interactions connecting actin to chromatin (LINC-dependent and -independent) are



545 individually weak, large numbers of attachments acting in parallel could support the high  
546 mechanical load needed to break DNA.

547 It is also possible that bridge breakage involves DNA processing enzyme(s) whose activity  
548 or access to DNA requires mechanical tension. Force-mediated ejection of nucleosomes from  
549 DNA (68), which explains the rapid loss of histone signal we and others have observed in bridges  
550 (26), might increase nuclease accessibility to bridge DNA. In principle, loss of nuclear envelope  
551 integrity could enable access of cytoplasmic nucleases such as TREX1 (26); yet we observed that  
552 knockout of TREX1 had no effect on bridge lifetime. Moreover, we did not detect an impact of  
553 nuclear envelope rupture on bridge breakage, which disfavors a mechanism based on NE-restricted  
554 access of cytoplasmic nucleases to bridge DNA. We therefore propose that mechanical force is  
555 either sufficient for DNA breakage or facilitates the action of one or more nuclear-localized  
556 factors, such as a nuclease or topoisomerase.

557 Whole-genome sequencing of single cells after chromosome bridge breakage during the  
558 interphase after they were formed revealed that bridge breakage resulted in either simple breaks or  
559 local DNA fragmentation, consistent with a breakage mechanism involving mechanical force.  
560 Indeed, we also observed both simple breakage and fragmentation when we mechanically broke  
561 intact chromosome bridges with a glass capillary. Mechanical bridge breakage could, in principle,  
562 cause localized chromosome fragmentation if forces were applied to multiple sites on chromatin,  
563 as might occur if the chromatin were in a looped conformation.

564 We highlight that our ability to draw mechanistic conclusions about bridge breakage  
565 benefitted from specific features of our analysis and experimental design: haplotype-specific DNA  
566 copy number measurement and the comparison of sister cells (Fig. 2). For example, we noted  
567 puzzling examples of internal chromosome segment copy number alterations after bridge breakage

568 (Fig. 2C). Duplication of an internal chromosome segment, as we observed in those daughter cells  
569 with copy number gain, would commonly be attributed to a DNA replication error involving  
570 template switching or to unequal sister chromatid exchange between repeat sequences (69).  
571 However, the comparison between sister cells instead showed this class of copy number alteration  
572 in our experiments is best explained by DNA breakage after chromosome-type fusions.

573

### 574 **Chromosomal rearrangements from abnormal nuclear architecture**

575 When bridge breakage was accompanied by fragmentation, we often detected chromosome  
576 rearrangements. In most cases, rearrangements resulted from ligation of fragments generated  
577 during bridge breakage. This gave rise to a range of outcomes (Fig. 3), from simpler patterns  
578 similar to the “local jump” footprint described in cancer genomes (42), to more complex events  
579 meeting the criteria for chromothripsis (45). In cases where multiple chromosomes appeared to  
580 be present in the bridge, we often also detected interchromosomal rearrangements between  
581 breakage sites.

582 A subset of bridge breakage events (4 of 20) showed a distinct pattern of extreme localized  
583 rearrangements, where small (~2–3 kb) regions contained focal clusters of ~10 breakpoints each.  
584 These “hotspots” were extensively inter-connected by rearrangements, despite being situated  
585 megabases apart in the reference genome or, occasionally, on different chromosomes. This  
586 generates a signature of multiple short (median ~150–200 bp) insertions present in tandem within  
587 rearrangement junctions (TST jumps; Fig. 5). We think TST jumps are likely generated by  
588 aberrant DNA replication involving replication template switching (12) for the following reasons.  
589 First, local breakpoint clusters are not expected from a random fragmentation process but could be  
590 generated by localized cycles of replication fork collapse, breakage, and aberrant replicative repair.

591 Second, the size distribution of inserted segments (Fig. 6C) is inconsistent with random  
592 fragmentation and re-ligation. In agreement with generally similar functional defects in  
593 micronuclei and chromosome bridges, we previously identified an example of multiple short  
594 tandem insertions in single cell analysis of chromothripsis derived from a micronucleus (17).

595 The TST jump signature does not result from artifacts during single-cell whole-genome  
596 amplification because a similar pattern was observed in bulk sequencing analysis of clonal  
597 populations of cells after bridge breakage. Furthermore, we also observed a similar signature by  
598 long-read sequencing of a renal cell carcinoma genome. Features of the TST jump signature have  
599 been described in large cancer data sets (1, 70) and tandem arrays of short insertions have also  
600 been noted in lung cancer genomes, where they may be common ((71) and J. Lee, personal  
601 communication). Although the cause of the TST jump signature is unknown, an origin for the  
602 insertions from Okazaki fragments might explain the size distribution of the insertions, which is  
603 strikingly similar in all of the contexts in which the pattern has been observed.

604 We demonstrate that similar DNA replication abnormalities occur in bridges and in  
605 micronuclei whose nuclear envelopes are intact. This finding demonstrates that nuclear envelope  
606 rupture (18) is not absolutely necessary for complex rearrangements on micronuclear  
607 chromosomes. Common functional defects of the nucleoplasm in chromosome bridges and  
608 micronuclei make sense, given these structures share a common defect in nuclear envelope  
609 assembly (19). Generally, DNA replication errors are thought to be major sources of structural  
610 variation in cancer genomes. However, what triggers these replication errors in the first place  
611 remains poorly understood. We propose that nuclear architecture defects, a hallmark feature of  
612 human cancer termed nuclear atypia (72) are a major trigger for cancer-associated DNA replication  
613 errors.

614

## 615 **A wave of DNA damage from aberrant mitotic DNA replication**

616 Based on the high frequency of chromothripsis after cells pass through mitosis, we  
617 performed a series of experiments that uncovered an unexpected burst of DNA replication that  
618 occurs during mitosis, specifically on the stubs of broken chromosome bridges or on micronuclear  
619 chromosomes. This mitotic DNA replication is highly aberrant as it produces heavy DNA damage  
620 and ssDNA formation. Although some ssDNA forms on bridges in interphase (26), the amount of  
621 ssDNA is far greater in mitosis (Fig. 7). Mitotic replication may therefore make a significant  
622 contribution to the kataegis pattern that has been linked to chromosome bridge breakage (Figs. S9  
623 and S19; also see (26)).

624 The mechanism triggering mitotic DNA replication on bridge stubs or micronuclear  
625 chromosomes is not known. However, because bridge and micronuclear DNA is incompletely  
626 replicated during interphase, these structures likely contain stalled DNA replication forks and  
627 licensed replication origins that have not fired. Our prior experiments demonstrate that for  
628 micronuclei, incomplete DNA replication occurs because of defective nucleocytoplasmic  
629 transport, leading to a failure to accumulate key proteins required for DNA replication and repair  
630 (14, 19). However, when cells enter mitosis, the nuclear envelope surrounding the primary nucleus,  
631 micronucleus or chromosome bridge will be broken down near-simultaneously. When this occurs,  
632 under-replicated bridge or micronuclear DNA will suddenly gain access to the pool of replication  
633 factors that had been sequestered in the primary nucleus throughout interphase. Access to  
634 replication factors, coupled with high mitotic cyclin-dependent kinase activity (51, 73), likely then  
635 activates replication on this incompletely replicated DNA. The DNA damage resulting from  
636 mitotic DNA replication may have a number of causes including the well-described activation of

637 structure-specific endonucleases in mitosis (74) and/or the recently discovered cleavage of stalled  
638 DNA replication forks that occurs because of removal of the MCM2-7 replicative helicase from  
639 mitotic chromosomes (51, 75).

640

#### 641 **Loss of the centromeric epigenetic mark in chromosome bridges**

642 In addition to the above described mutational events, we found that chromosome bridge  
643 formation predisposes to micronucleation, which could then initiate another round of  
644 chromothripsis downstream of bridge breakage (14, 17, 76). We attribute the high rate at which  
645 bridge chromosomes mis-segregate in the second mitosis to depletion of CENP-A nucleosomes,  
646 which provide the epigenetic specification of centromere identity (77, 78). Two mechanisms likely  
647 contribute to CENP-A loss. First, because bridges largely lack nuclear pore complexes (19, 26)  
648 and have dimensions that will impede diffusion (79), they should fail in the normal replenishment  
649 of CENP-A nucleosomes that occurs each cell division. However, in the timeframe of our  
650 experiments, this dilution cannot account for the observed magnitude of CENP-A loss. Instead,  
651 our data suggests active CENP-A loss, which we propose may originate from stripping of CENP-  
652 A containing nucleosomes by actomyosin forces when centromeric chromatin is trapped within  
653 the bridge (Movie S16). The forces required to strip nucleosomes from DNA (~20 pN) are ~50-  
654 fold lower than those required to break covalent bonds in the backbone (63, 64, 68). Thus, in  
655 addition to promoting mutagenesis, actomyosin contractility may disrupt epigenetic marks on  
656 chromatin.

657

## 658 **Rapid genome evolution from a single cell division error**

659           The above described cascade of events is predicted to generate ongoing cycles of complex  
660 genome evolution. We tested this hypothesis with a CRISPR-based system to track the fate of a  
661 defined chromosome (Chr4) bridge. In populations derived from a single cell after bridge  
662 breakage, we detected extensive genetic heterogeneity, with evidence that chromothripsis recurs  
663 downstream of initial bridge breakage.

664           Together, these findings identify mechanisms that explain the remarkable potential of a  
665 single unrepaired DNA break to compromise the integrity of the genome. In human cells, a single  
666 DNA break only weakly, if at all, activates the DNA damage response to block cell cycle  
667 progression (80, 81). This means that unrepaired breaks can be amplified into many additional  
668 breaks when the cell divides due to the generation of micronuclei or additional chromosome  
669 bridges. Because de novo telomere addition is inefficient (82), stable end-capping of chromosomes  
670 is primarily achieved through chromosome translocation or break-induced DNA replication (83).  
671 For a stable chromosome to result, the DNA segment with the capped ends must additionally  
672 contain only one functional centromere. The end result is that downstream of chromosome bridge  
673 formation, it is easy for the accumulating burden of DNA breakage to exceed the capacity to  
674 stabilize broken DNA ends. Complex genome evolution with subclonal heterogeneity is therefore  
675 a virtually inevitable consequence of chromosome bridge formation, a common cell division error  
676 during tumor development.

677

678

## 679 **FIGURE LEGENDS**

### 680 **Figure 1. Chromosome bridge breakage requires actomyosin contractility.**

681 (A) Indistinguishable chromosome bridge lifetimes observed with different experimental  
682 methods for bridge induction. Survival plot shows bridge lifetimes (time interval from  
683 bridge formation after mitosis until bridge breakage or the next mitosis; visualized with  
684 GFP-BAF). Methods of bridge induction were: inducible dominant-negative TRF2 (black,  
685  $n = 624$  bridges analyzed), partial knockdown of condensin (siSMC2, green,  $n = 119$ ), low-  
686 dose topoisomerase II inhibition (100 nM ICRF-193, magenta,  $n = 121$ ), and inducible  
687 CRISPR/Cas9-targeted telomere loss on chromosome 4 (Chr4g1, blue,  $n = 132$ ). No  
688 significant difference in mean lifetime is found among the four methods ( $p = 0.14$ , one-  
689 way ANOVA).

690 (B) Extension of chromosome bridges is required for their breakage. Representative time-lapse  
691 images (GFP-BAF) of cells with bridges on “long” ( $20 \times 300 \mu\text{m}$ , left) or “short” ( $20 \times 100$   
692  $\mu\text{m}$ , right) fibronectin micropatterns. Note: due to the area occupied by the main cell body  
693 of each daughter, bridge length does not exceed  $\sim 50 \mu\text{m}$  on short patterns. Dashed lines:  
694 micropattern borders; teal arrowheads: broken bridge ends. Timestamp is relative to  
695 completion of the previous mitosis (0 hr).

696 (C) Quantification of data from (B). Orange and teal traces show data for cells on short ( $n =$   
697  $45$ ) and long ( $n = 54$ ) micropatterns;  $p < 0.0001$  (Mann-Whitney).

698 (D) A representative chromosome bridge breakage event. Prior to breakage, there is apparent  
699 non-uniform stretching of the bridge (GFP-BAF). Magenta arrowhead indicates a  
700 transition between “taut” and “slack” regions of the bridge. The taut region appears to  
701 progressively stretch, whereas the slack region progressively retracts; breakage occurs in

702 the taut region. Inset images: high contrast of the regions marked by dashed red boxes to  
703 visualize the taut region before and after breakage. Timestamp is relative to bridge  
704 breakage (min).

705 (E) Actin dynamics during chromosome bridge breakage. Actin is detected with RFP-Utr261;  
706 bridges with GFP-BAF. Contraction of the actin-rich structure (magenta arrowheads)  
707 occurs immediately preceding and up to the time of bridge breakage (-25 to 0 min). After  
708 bridge breakage, the actin structure rapidly disassembles (20 min). Timestamp is relative  
709 to bridge breakage (min).

710 (F) Representative images show large focal adhesions ( $\alpha$ -Paxillin) and actin fibers (phalloidin)  
711 at the bent region of a chromosome bridge (GFP-BAF), indicated by cyan arrowheads.

712 (G) As in (B), representative accumulation of contractile myosin II ( $\alpha$ -myosin heavy chain,  
713 MHC;  $\alpha$ -phospho-myosin light chain 2, pMLC2) at the transition between taut and slack  
714 segments of a chromosome bridge.

715 (H) Actomyosin contractility is required for bridge breakage. Bridge lifetime plots show the  
716 effect of actin disruption (0.5  $\mu$ M Latrunculin A; red trace, n = 66) or myosin II inhibition  
717 (20  $\mu$ M ML7; orange trace, n = 113) relative to controls (DMSO; black trace, n = 184).  
718 Cells were allowed to divide, form and extend chromosome bridges and were then  
719 exchanged into drug medium (see Fig. S5B).

720 (I) Increasing cellular contractility decreases bridge lifetime. Bridge lifetimes for cells plated  
721 on untreated glass (black, n = 148) or fibronectin (FN)-coated glass (light blue, n = 150).

722 (J) Bridge breakage depends on substrate stiffness. Bridge lifetimes were measured for cells  
723 plated on substrates of varying stiffness, each coated with 5  $\mu$ g/ml fibronectin: glass ( $>10^6$



724 kPa; light blue, n = 123), stiff gel (32 kPa; medium blue, n = 147), and soft gel (0.5 kPa;  
725 dark blue, n = 130).

726 (K) Bridge breakage in part requires the LINC complex. Bridge lifetimes for wild-type (black,  
727 n = 90), SUN1 knockout (orange, n = 90), SUN2 knockout (green, n = 90), and  
728 SUN1/SUN2 double knockout (red, n = 90) RPE-1 cells.

729 **Figure 2. Immediate effect of chromosome bridge breakage on DNA copy number.**

730 (A) Cartoon illustrating the Look-Seq experiment. Bridge formation and breakage was  
731 monitored during live imaging. After bridge breakage, individual daughter cells were  
732 isolated for whole-genome sequencing.

733 (B) Schematic summary of large-scale ( $\geq 2.5$  Mb) DNA copy number alterations after bridge  
734 breakage. Dashed boxes show the p- and q-arms of each chromosome. Chromosome arms  
735 that contain a subregion with copy number alterations are colored as follows: white,  
736 diploid; red, gain; blue, loss; gray, copy-neutral loss of heterozygosity. Right: bridge  
737 lifetime and bridge length at the time of breakage for each sample.

738 (C) Type 1 events are daughter cells with reciprocal gain and loss of a terminal chromosome  
739 segment. Cartoon depicts chromatid fusion events initiated by DNA breaks or telomere  
740 uncapping. Left: sister chromatid fusion; Right: fusion of single chromatids from different  
741 chromosomes (G2 cell). The resulting dicentric fusions are segregated in mitosis (green  
742 dashed arrows) to form a bridge. Breakage of the bridge (dashed red line) generates the  
743 depicted reciprocal copy number alterations. Bottom: representative plot of DNA copy  
744 number (gray dots show mean copy number of 1-Mb bins) for the affected haplotype  
745 resulting from a Type 1 bridge breakage event involving the q-arm of chromosome 2. Red  
746 bar: inferred bridge breakpoint. Light gray bar: centromere.

747 (D) Type 2 events are reciprocal gain and loss of an internal chromosome segment between the  
748 daughter cells. Top: cartoon depicts a chromosome fusion (28) (e.g. from replication of an  
749 interchromosomal fusion occurring in G1). If the kinetochores of the dicentric chromatids  
750 attach to microtubule bundles from opposite poles (dashed green arrows), one dicentric  
751 will assume an inverted orientation relative to the other (middle panel). In contrast to the  
752 scenarios depicted in (C), cleavage of both chromatids in the resulting bridge at the  
753 indicated position yields reciprocal copy number alterations of an internal chromosome  
754 segment. Bottom, plot of DNA copy number as in (C).

755 **Figure 3. Small-scale, highly localized DNA breakage and rearrangement with bridge**  
756 **breakage.**

757 (A) Simple breakage of a bridge chromosome. Left: CIRCOS plots showing the bridge  
758 chromosome (Chr4) in the 4-2 daughter pair (Fig. 3B). DNA copy number is shown for the  
759 bridge haplotype (gray bars/black outline) and the non-bridge haplotype (white bars/grey  
760 outline); intrachromosomal rearrangements are shown as green arcs, chromosome band  
761 pattern is shown in the outer arc. Red arrowhead indicates the bridge breakpoint. Right:  
762 Expanded view of DNA copy number at the breakpoint transition (gray dots show 250-kb  
763 bins). Copy-number segments (red solid lines) are determined using SNP-level coverage  
764 in the top daughter (see Methods). The reciprocal pattern is shown for the bottom daughter  
765 (red dashed lines). This line represents the expected copy number in the bottom daughter  
766 based on fragmentation detected in the top daughter, assuming that two copies of the shown  
767 homolog were distributed between both daughters. Structural variants (SV) are shown  
768 above the copy-number plots as in the CIRCOS plots.

769 (B) Generation of the “local jump” pattern from bridge breakage. As in (A), shown are  
770 CIRCOS plots (Left) and DNA copy number plots with rearrangements (Right) for the  
771 bridge chromosome (Chr4) in the 4-4 daughter pair.

772 (C) Local fragmentation with complex rearrangement associated with bridge breakage. As in  
773 (A), CIRCOS plots (Left) and DNA copy number plots with rearrangement (Right) in the  
774 C-2 daughter pair, whose bridge contained three different chromosomes (Chrs 4, 5, and 6).  
775 Each bridge chromosome contains multiple breaks resulting in local fragmentation. The  
776 pattern of rearrangements in daughter (b) indicates end-joining of these fragments,  
777 including the formation of inter-chromosomal rearrangements (orange arcs or lines). In  
778 addition to fragmentation, daughter (a) evidences the TST jump rearrangement pattern (see  
779 Fig. 5).

780 **Figure 4. Local fragmentation accompanies mechanical breakage of bridges and does not**  
781 **require TREX1.**

782 (A) Mechanical breakage of chromosome bridges produces a spectrum of outcomes from  
783 simple breakage to local fragmentation. Left: schematic of the experiment using a glass  
784 capillary to mechanically stretch and break chromosome bridges. The daughter cells were  
785 collected for sequencing immediately after mechanical bridge breakage, to determine its  
786 direct consequences. Therefore, cells did not have time for DNA repair to generate  
787 chromosomal rearrangements. Top right: an example of simple bridge breakage. Plots as  
788 in Fig. 3, with the exception that grey dots in the whole-chromosome plot indicate 1 Mb  
789 bins due to lower (5×) sequence depth. Bottom right: two examples of local fragmentation.  
790 (B) A similar spectrum from simple breakage to local fragmentation after spontaneous bridge  
791 breakage in cells lacking TREX1. Left: DNA copy number plots, as in (A), showing simple

792 bridge breakage in TREX1-null cells. Right: local fragmentation of the bridge  
793 chromosome, with chromosome rearrangements (green arcs and orange lines) due to end-  
794 joining of the resulting fragments.

795 **Figure 5. The Tandem Short Template (TST) jump rearrangement signature and aberrant**  
796 **DNA replication within broken chromosome bridges.**

797 (A) Extreme breakpoint clustering near the site of chromosome bridge breakage. Copy number  
798 (1-Mb bins, gray dots) and rearrangements (black curves and magenta lines) are shown as  
799 in Fig. 3 for daughter cell (a) of the T-1 sample. Copy-number segmentation based on the  
800 250-kb bin-level analysis (see Methods) is shown (bottom, black line). Uppermost  
801 (“rainfall”) plot shows the distance between adjacent breakpoints ( $\log_{10}$  scale); clustering  
802 of breakpoints is indicated from marked drops in inter-breakpoint distance (colored lines  
803 correspond to rearrangement hotspots in panel B).

804 (B) Features of the TST jump signature. Top: One chain of short insertions, colored according  
805 to their respective hotspot origin. The origin of each insertion in this chain is labeled in the  
806 hotspot plot below, showing its order in the template chain (i, ii, iii, etc.). Bottom left: The  
807 chain of insertions depicted above is shown as thick black lines, and other chains are thin  
808 black lines. Magenta line shows a short insertion derived from Chr11. Bottom right: Each  
809 hotspot (A-F) spans 1-2 kb and contains 4-8 short insertions (8-16 break ends); numbers  
810 indicate the position of each hotspot on the reference genome. The TST insertions (not  
811 drawn true-to-scale) within each hotspot often display partial overlap and form multiple  
812 chains. Filled shapes: TST insertions in the single, long chain shown above. Unfilled  
813 shapes: other TST insertions involved in different chains. Shapes open on one side

814 represent the start or end of chains, where only one segment boundary could be determined  
815 via SV analysis.

816 (C) Cytological observation of under-replication of chromatin in bridges. Cells with intact (top)  
817 or broken (bottom) chromosome bridges were pulse-labeled in S phase with EdU. Bridges,  
818 marked by cyan arrowheads, were visualized by staining for LAP2. Insets (magenta boxes)  
819 show the broken bridge stub.

820 (D) Example of interphase under-replication of DNA in bridges detected by single-cell  
821 sequencing. Cells were isolated after a Look-Seq experiment (Fig. 3A). Shown are copy  
822 number plots for the bridge haplotype (black dots) and the control, non-bridge haplotype  
823 (gray dots). Gray shading: region of under-replication of bridge haplotype. The mean copy  
824 number in this 20-Mb region (grey rectangle) for the bridge haplotype, 1.56, is lower than  
825 the expected gain (CN = 2) for this region. Partial retention of that haplotype in the sister  
826 cell (median CN of bridge haplotype = 0.05) does not explain the extent of “missing” DNA.

827 **Figure 6. The Tandem Short Template (TST) jump rearrangement signature in primary**  
828 **clones from bridged cells and in a primary tumor sample.**

829 (A) The TST jump signature is observed in bulk sequencing of the progeny of a single cell after  
830 bridge breakage. Top: DNA copy number of the bridge chromosome (Chr4) is shown as  
831 gray dots (250-kb bins). Long-range rearrangements (distance between breakpoints > 1Mb)  
832 on Chr4 are shown as black or colored curves. Three chains of complex rearrangements  
833 (similar to the chain illustrated in Fig. 5B), each consisting of 8-14 short templates  
834 originating from 11 breakpoint hotspots, are shown with blue, green, and red curves. Black  
835 curves indicate rearrangements not obviously linked in chains. Bottom: the chains of  
836 insertions are shown schematically, where templated insertions (gray boxes with black

837 outline) are connected as shown by blue, green, or red lines in an expanded view for each  
838 breakpoint cluster ( $\leq 10$ -kb window in each region). Grey vertical lines are axis breaks  
839 indicating distances larger than 10 kb.

840 (B) TST jump signature in a renal cell carcinoma sample. As in (A), upper plot shows copy  
841 number (gray dots: 10-kb bins) and rearrangements (black lines) for the region of  
842 unbalanced translocation between Chr3 and Chr5. Schematic below depicts one chain of  
843 templated insertions from long-read sequencing data, in an expanded view for each  
844 breakpoint cluster (3- to 10-kb windows in the hotspot regions labeled A-E).

845 (C) Chains of short insertions identified in bridged cells and in a primary tumor sample exhibit  
846 a similar fragment size distribution. Histograms show the size distribution for chained short  
847 insertions from single-cell sequencing of a daughter cell after bridge breakage (left; data  
848 from Fig. 5B), from bulk sequencing of progeny derived from a single cell after bridge  
849 breakage (center; data from panel A), and from long-read sequencing data from the renal  
850 cell carcinoma sample (right; data from panel B).

851 **Figure 7. Aberrant DNA replication and extensive DNA damage on bridge DNA after mitotic**  
852 **entry.**

853 (A) Correlative live-cell/fixed-cell imaging was used to monitor broken bridge chromosomes  
854 entering the next mitosis. Left: schematic of the experiment. Right: example images show  
855 cells with broken bridges in G2 arrest and after release into mitosis, as well as a control  
856 mitotic cell that did not have a bridge in the prior interphase. Cyan arrowheads: bridge  
857 chromosome.

858 (B) Quantification from (A).

859 (C) Images showing correlation of DNA damage ( $\gamma$ -H2AX) with RPA accumulation and active  
860 DNA replication (EdU). Cyan arrowheads: bridge chromosome.

861 (D) Representative time-lapse images showing a burst of mitotic DNA replication specifically  
862 on a chromosome from a broken bridge. Mitotic replication was visualized by GFP-RPA2;  
863 bridge with SNAP-BAF. During mitosis, high activity of vaccinia related kinase (VRK)  
864 inactivates DNA binding by BAF (10 to 25 min). Orange arrowheads indicate the broken  
865 bridge chromosome. Note that an unrelated interphase cell migrates through the bottom of  
866 the field of view in several frames (10 to 35 min). Confocal imaging was performed with  
867 a 40 $\times$  objective, 7 z-slices at 1- $\mu$ m spacing, acquired every 5 min.

868 **Figure 8. Centromere inactivation on chromosomes within bridges leads to frequent**  
869 **micronucleation.**

870 (A) Frequent micronucleation in the second generation after bridge formation. Left:  
871 schematic of the live-cell imaging experiment. A cell divides, forming a bridge between  
872 two daughter cells in the first generation. After the bridge breaks, the daughter cells with  
873 broken bridge stubs divide, generating four “grand-daughter” cells in the second  
874 generation. The frequency of micronucleation in second generation cells was measured in  
875 control cells that did not have a bridge in the first generation (No bridge) as compared to  
876 cells that did (Bridge). Right: quantification of data from the experiment.

877 (B) Micronuclei derived from a bridge chromosome usually retain their centromeres. Left:  
878 fluorescence in situ hybridization (FISH) to detect whole-chromosome 4 (Chr4 paint, red)  
879 and Chr4 centromere (CEN4, green) in first- and second-generation cells after CRISPR-  
880 mediated Chr4 bridge formation. Right: quantification of CEN4 status of Chr4-containing  
881 MN in second-generation cells.

882 (C) Centromere defects explain the high rate of micronucleation after chromosome bridge  
883 formation. Left: representative images showing CENP-A-Halo labeling (green) and anti-  
884 centromere FISH (red) to assess centromere integrity of chromosomes in micronuclei  
885 (second-generation cells, as in (A)). Cyan arrowheads indicate the location of the  
886 centromere (FISH signal) in micronuclei. Right: quantification of CENP-A-Halo levels at  
887 centromeres in micronuclei (MN), relative to those in primary nuclei (PN),  $p < 0.0001$   
888 (paired *t*-test). Bridges were induced in the first generation by transient TRF2-DN  
889 expression. Only centromere DNA-containing micronuclei were analyzed.

890 **Figure 9. Micronuclei develop extensive DNA damage associated with a burst of mitotic DNA**  
891 **synthesis, which promotes chromothripsis.**

892 (A) Modest DNA damage is associated with defective replication in intact micronuclei of G2  
893 cells. Top: schematic of the experiment. Micronuclei were induced by a nocodazole  
894 washout procedure (17), and EdU was added in G1 to visualize all DNA replication during  
895 the following S phase. Cells were then fixed in G2 (22 hours after mitosis). Where  
896 indicated, small-molecule inhibitors of Dbf4-dependent kinase (PHA-767491) or cyclin-  
897 dependent kinase (flavopiridol) were also added in G1 to block the initiation of DNA  
898 replication. Bottom: example images show intact micronuclei (assessed by RFP-NLS),  
899 with counter-staining to relate the extent of DNA replication (EdU) to the amount of DNA  
900 damage ( $\gamma$ -H2AX). Robust  $\gamma$ -H2AX signal was correlated with diminished EdU signal and  
901 was blocked by the DDK or CDK inhibitors.

902 (B) Quantification of (A) showing DNA damage in micronuclei with poor DNA replication.  
903 Left: DNA damage in intact micronuclei (ratio of  $\gamma$ -H2AX intensity in the micronucleus  
904 relative to the primary nucleus) relative to replication proficiency (EdU ratio). Dashed red



905 line indicates the threshold (three standard deviations above the mean intensity for primary  
906 nuclei) above which micronuclei were scored as positive for DNA damage. Right:  
907 compared to control, CDKi ( $p = 0.01$ ) or DDKi ( $p = 0.0008$ ) prevents DNA damage in  
908 intact micronuclei;  $p$ -values determined by Mann-Whitney test.

909 (C) Complex rearrangement of a chromosome from an intact micronucleus in a G2 cell. The  
910 chromosome from the micronucleus (Chr2) is under-replicated and was identified by its  
911 odd-numbered copy number state. The mis-segregation generating this micronucleus  
912 resulted in a diploid cell with an extra copy of Chr2 from the micronucleus ( $2N+1$ ) (17).  
913 Black dots: 1-Mb bins for the haplotype of the micronuclear chromosome, which together  
914 with the fully replicated copy of Chr2 haplotype in the primary nucleus, leads to black copy  
915 number of  $\sim 3$ . Gray dots: the other Chr2 haplotype, which is also in the primary nucleus  
916 and present at a copy number of 2.  $n = 1$  of 10 cells examined; the remaining 9 G2  
917 micronucleated cells did not exhibit rearrangement of the micronucleated chromosome.

918 (D) Mitotic DNA replication and DNA damage (synchronized fixed cells), similar to Fig. 7C,  
919 for cells induced to form micronuclei by nocodazole washout. Cyan arrowheads:  
920 micronucleated chromosome.

921 (E) Parallel experiments as in Fig. 7A-B, for cells with intact micronuclei that were released  
922 into mitosis. To avoid confounding DNA damage from interphase nuclear envelope  
923 rupture, only cells with intact micronuclei (RFP-NLS) were analyzed. Cyan arrowheads:  
924 micronucleated chromosome.

925 (F) Quantification from (E). Levels of DNA damage on the micronucleated chromosome  
926 increased  $\sim 10$ -fold in mitotic cells compared to G2 cells ( $p < 0.0001$ , left plot), concomitant

927 with abrupt initiation of mitotic DNA synthesis as indicated by RPA1 accumulation ( $p <$   
928 0.0001, right plot);  $p$ -values calculated by Mann-Whitney test.

929 (G) Complex rearrangement of a chromosome from an intact micronucleus after passing  
930 through mitosis. Copy number and rearrangements are shown for the micronucleated  
931 chromosome (one haplotype of Chr2), identified by its odd copy number as described in  
932 (C). 8 of 9 daughter pairs examined evidenced complex rearrangements on  
933 the micronucleated chromosome.

934 **Figure 10. Extensive genetic heterogeneity after chromosome bridge formation.**

935 (A) Multiple co-existing subclones in a population derived from a cell with a broken  
936 chromosome bridge (Chr4, see Fig. S1). Top: DNA copy number of the two Chr4  
937 homologs (red and blue dots, 25-kb bins) from bulk DNA sequencing of Primary Clone  
938 2a. Non-integer copy number indicates the presence of multiple subclones with different  
939 copy number states.

940 (B) Heatmap of DNA copy number for Homolog A on the p-arm of Chr4 (0-50 Mb) in ~800  
941 single cells, where each row represents one cell. Different subclonal populations can be  
942 identified with copy number profiles consistent with those seen in single cell-derived  
943 subclones shown in (C).

944 (C) DNA copy number of Chr4p Homolog A (red dots, 25-kb bins) in three subclones grown  
945 from single cells isolated from Primary Clone 2a. The copy number state is shown  
946 schematically above each plot. The copy number change point shared across all  
947 subclones (dashed orange line) is inferred to have resulted from breakage of the Chr4  
948 bridge chromosome in the first generation. Other copy number changes that were shared  
949 only among a subset of subclones (dashed purple line), or were private to individual

950 subclones (dashed cyan lines), suggest that these more complex patterns arose during  
951 later generations downstream of the initial bridge breakage event.

952 (D) Evidence of ongoing chromosomal instability in Chr4 bridge primary clones indicated by  
953 copy number variations across subclones. Top: Bulk DNA copy number of Homolog A  
954 (red) and Homolog B (blue) on Chr4p (0-50Mb) in Primary Clone 1a. Bottom: Copy  
955 number profiles of each homolog in single-cell derived subclones. The first profile of  
956 Homolog A was observed together with each of the first eight profiles of Homolog B, as  
957 shown by the thick black lines. Similarly, the next five profiles of Homolog A were each  
958 observed together with the ninth profile of Homolog B. The last profiles of Homologs A  
959 and B were observed together (two independent subclones). Copy number breakpoints on  
960 Homolog A that are shared among all subclones are indicated by vertical dashed black  
961 lines. Variations in Homolog A range from focal copy number changes (red arrows),  
962 including focal amplifications, to near-complete arm loss (last profile). Profiles of  
963 Homolog B show different degrees of terminal loss, a pattern that suggests ongoing  
964 instability affecting this chromosome. This is supported by the observation that many of  
965 these Homolog B profiles were present at a low clonal fraction (i.e. observed in only one  
966 subclone). Therefore, this progressive terminal loss pattern might represent a snapshot of  
967 ongoing evolution that eventually results in complete loss of the chromosome arm.

968

## 969 **ACKNOWLEDGEMENTS**

970 We would like to thank M. Bao, P. Campbell, M. Kwon, J. Lee, S. Liu, M. Meyerson, J.  
971 Walter, and K. Xie for comments on the manuscript; I. Cheeseman, Maciejowski and T. de Lange  
972 for reagents; P. Campbell, J. Maciejowski and T. de Lange for sharing unpublished results. N.T.U.

973 was an HHMI Fellow of the Damon Runyon Cancer Institute and is supported by the Claudia  
974 Adams Barr Program for Innovative Cancer Research. T.M. is supported by Cancer Research UK  
975 and the Royal College of Surgeons (C63474/A27176). C.-Z.Z. is supported by an NCI career  
976 transition award (K22CA216319). C.-Z.Z. and L.S. are supported by an NCI Cancer Moonshot  
977 award (1R33CA225344.). R.T. and H.F.A. are supported by the Harvard University Milton Fund.  
978 A.S. is supported by an NCI Mentored Clinical Scientist Research Career Development  
979 Award (K08CA208008) and a Burroughs-Wellcome Career Award for Medical Scientists  
980 (CAMS). D.P. is a HHMI investigator and is supported by NIH grant GM083299, a Research  
981 Investigator Award from the Lustgarten Foundation, and an award from the G. Harold and Leila  
982 Y. Mathers Charitable Foundation.

983

## 984 **AUTHOR CONTRIBUTIONS**

985 D.P., N.T.U., and C.-Z.Z. conceived the project. D.P. and N.T.U. designed the biological  
986 experiments, which were performed by A.M.C., L.D.L. and N.T.U. D.P., N.T.U., and C.-Z.Z.  
987 designed the sequencing experiments, which were performed by L.S. and N.T.U. C.-Z.Z. designed  
988 and performed the analysis of single-cell and bulk sequencing data of RPE-1 samples, with help  
989 from L.J.B. The low-pass single-cell CNV analysis was performed by R.T. and H.F.A. T.J.M.,  
990 and K.J. contributed the data and analysis in Fig. 5D. A.S. contributed the data in Figs. 7C and  
991 7G, and to early experiments on the project. D.P. and N.T.U. wrote the manuscript with edits from  
992 other authors.

993

994

## 995 SUPPLEMENTAL MATERIALS

996

997 Materials and Methods

998 Table S1.

999 Figures S1-S20

1000 Movies S1-S16

1001 References 84-95

1002

1003

## 1004 REFERENCES

- 1005 1. P. J. Campbell, G. Getz, J. M. Stuart, J. O. Korb, L. D. Stein, Pan-cancer analysis of  
1006 whole genomes. *BioRxiv*, (2017).
- 1007 2. T. Fujiwara *et al.*, Cytokinesis failure generating tetraploids promotes tumorigenesis in  
1008 p53-null cells. *Nature* **437**, 1043-1047 (2005).
- 1009 3. M. L. Leibowitz, C. Z. Zhang, D. Pellman, Chromothripsis: A New Mechanism for Rapid  
1010 Karyotype Evolution. *Annu Rev Genet* **49**, 183-211 (2015).
- 1011 4. P. Ly, D. W. Cleveland, Rebuilding Chromosomes After Catastrophe: Emerging  
1012 Mechanisms of Chromothripsis. *Trends Cell Biol* **27**, 917-930 (2017).
- 1013 5. P. J. Stephens *et al.*, Massive genomic rearrangement acquired in a single catastrophic  
1014 event during cancer development. *Cell* **144**, 27-40 (2011).
- 1015 6. S. Turajlic, A. Sottoriva, T. Graham, C. Swanton, Resolving genetic heterogeneity in  
1016 cancer. *Nat Rev Genet* **20**, 404-416 (2019).
- 1017 7. S. M. A. Lens, R. H. Medema, Cytokinesis defects and cancer. *Nat Rev Cancer* **19**, 32-45  
1018 (2019).
- 1019 8. N. J. Ganem, S. A. Godinho, D. Pellman, A mechanism linking extra centrosomes to  
1020 chromosomal instability. *Nature* **460**, 278-282 (2009).
- 1021 9. M. Kwon *et al.*, Mechanisms to suppress multipolar divisions in cancer cells with extra  
1022 centrosomes. *Genes Dev* **22**, 2189-2203 (2008).
- 1023 10. S. P. R *et al.*, Profiling DNA damage response following mitotic perturbations. *Nat*  
1024 *Commun* **7**, 13887 (2016).
- 1025 11. D. Cimini *et al.*, Merotelic kinetochore orientation is a major mechanism of aneuploidy in  
1026 mitotic mammalian tissue cells. *J Cell Biol* **153**, 517-527 (2001).
- 1027 12. P. Liu *et al.*, Chromosome catastrophes involve replication mechanisms generating  
1028 complex genomic rearrangements. *Cell* **146**, 889-903 (2011).

- 1029 13. F. Notta *et al.*, A renewed model of pancreatic cancer evolution based on genomic  
1030 rearrangement patterns. *Nature* **538**, 378-382 (2016).
- 1031 14. K. Crasta *et al.*, DNA breaks and chromosome pulverization from errors in mitosis.  
1032 *Nature* **482**, 53-58 (2012).
- 1033 15. P. Ly *et al.*, Selective Y centromere inactivation triggers chromosome shattering in  
1034 micronuclei and repair by non-homologous end joining. *Nat Cell Biol* **19**, 68-75 (2017).
- 1035 16. P. N. Rao, R. T. Johnson, Premature Chromosome Condensation. *Academic Press*,  
1036 (1982).
- 1037 17. C. Z. Zhang *et al.*, Chromothripsis from DNA damage in micronuclei. *Nature* **522**, 179-  
1038 184 (2015).
- 1039 18. E. M. Hatch, A. H. Fischer, T. J. Deerinck, M. W. Hetzer, Catastrophic nuclear envelope  
1040 collapse in cancer cell micronuclei. *Cell* **154**, 47-60 (2013).
- 1041 19. S. Liu *et al.*, Nuclear envelope assembly defects link mitotic errors to chromothripsis.  
1042 *Nature* **561**, 551-555 (2018).
- 1043 20. J. Maciejowski, T. de Lange, Telomeres in cancer: tumour suppression and genome  
1044 instability. *Nat Rev Mol Cell Biol* **18**, 175-186 (2017).
- 1045 21. B. McClintock, The Stability of Broken Ends of Chromosomes in *Zea Mays*. *Genetics*  
1046 **26**, 234-282 (1941).
- 1047 22. N. Shimizu, K. Shingaki, Y. Kaneko-Sasaguri, T. Hashizume, T. Kanda, When, where  
1048 and how the bridge breaks: anaphase bridge breakage plays a crucial role in gene  
1049 amplification and HSR generation. *Exp Cell Res* **302**, 233-243 (2005).
- 1050 23. Y. Li *et al.*, Constitutional and somatic rearrangement of chromosome 21 in acute  
1051 lymphoblastic leukaemia. *Nature* **508**, 98-102 (2014).
- 1052 24. J. G. Carlton, A. Caballe, M. Agromayor, M. Kloc, J. Martin-Serrano, ESCRT-III  
1053 governs the Aurora B-mediated abscission checkpoint through CHMP4C. *Science* **336**,  
1054 220-225 (2012).
- 1055 25. A. Janssen, M. van der Burg, K. Szuhai, G. J. Kops, R. H. Medema, Chromosome  
1056 segregation errors as a cause of DNA damage and structural chromosome aberrations.  
1057 *Science* **333**, 1895-1898 (2011).
- 1058 26. J. Maciejowski, Y. Li, N. Bosco, P. J. Campbell, T. de Lange, Chromothripsis and  
1059 Kataegis Induced by Telomere Crisis. *Cell* **163**, 1641-1654 (2015).
- 1060 27. P. Steigemann *et al.*, Aurora B-mediated abscission checkpoint protects against  
1061 tetraploidization. *Cell* **136**, 473-484 (2009).
- 1062 28. B. van Steensel, A. Smogorzewska, T. de Lange, TRF2 protects human telomeres from  
1063 end-to-end fusions. *Cell* **92**, 401-413 (1998).
- 1064 29. T. A. Hartl, S. J. Sweeney, P. J. Knepler, G. Bosco, Condensin II resolves chromosomal  
1065 associations to enable anaphase I segregation in *Drosophila* male meiosis. *PLoS Genet* **4**,  
1066 e1000228 (2008).
- 1067 30. C. F. Nielsen *et al.*, PICH promotes sister chromatid disjunction and co-operates with  
1068 topoisomerase II in mitosis. *Nat Commun* **6**, 8962 (2015).
- 1069 31. M. Thery, Micropatterning as a tool to decipher cell morphogenesis and functions. *J Cell*  
1070 *Sci* **123**, 4201-4213 (2010).
- 1071 32. B. J. Belin, L. M. Goins, R. D. Mullins, Comparative analysis of tools for live cell  
1072 imaging of actin network architecture. *Bioarchitecture* **4**, 189-202 (2014).
- 1073 33. Y. Ren *et al.*, Mechanosensing through cooperative interactions between myosin II and  
1074 the actin crosslinker cortexillin I. *Curr Biol* **19**, 1421-1428 (2009).

- 1075 34. S. L. Gupton, C. M. Waterman-Storer, Spatiotemporal feedback between actomyosin and  
1076 focal-adhesion systems optimizes rapid cell migration. *Cell* **125**, 1361-1374 (2006).
- 1077 35. V. G. Brunton, I. R. MacPherson, M. C. Frame, Cell adhesion receptors, tyrosine kinases  
1078 and actin modulators: a complex three-way circuitry. *Biochim Biophys Acta* **1692**, 121-  
1079 144 (2004).
- 1080 36. S. Miyamoto, B. Z. Katz, R. M. Lafrenie, K. M. Yamada, Fibronectin and integrins in  
1081 cell adhesion, signaling, and morphogenesis. *Ann N Y Acad Sci* **857**, 119-129 (1998).
- 1082 37. A. Saez, A. Buguin, P. Silberzan, B. Ladoux, Is the mechanical activity of epithelial cells  
1083 controlled by deformations or forces? *Biophys J* **89**, L52-54 (2005).
- 1084 38. M. Crisp *et al.*, Coupling of the nucleus and cytoplasm: role of the LINC complex. *J Cell*  
1085 *Biol* **172**, 41-53 (2006).
- 1086 39. D. A. Starr, H. N. Fridolfsson, Interactions between nuclei and the cytoskeleton are  
1087 mediated by SUN-KASH nuclear-envelope bridges. *Annu Rev Cell Dev Biol* **26**, 421-444  
1088 (2010).
- 1089 40. T. Takaki *et al.*, Actomyosin drives cancer cell nuclear dysmorphia and threatens genome  
1090 stability. *Nat Commun* **8**, 16013 (2017).
- 1091 41. A. Smogorzewska, J. Karlseder, H. Holtgreve-Grez, A. Jauch, T. de Lange, DNA ligase  
1092 IV-dependent NHEJ of deprotected mammalian telomeres in G1 and G2. *Curr Biol* **12**,  
1093 1635-1644 (2002).
- 1094 42. Y. Li *et al.*, Patterns of structural variations in human cancer. *BioRxiv*, (2017).
- 1095 43. S. Nik-Zainal *et al.*, Mutational processes molding the genomes of 21 breast cancers. *Cell*  
1096 **149**, 979-993 (2012).
- 1097 44. S. A. Roberts *et al.*, Clustered mutations in yeast and in human cancers can arise from  
1098 damaged long single-strand DNA regions. *Mol Cell* **46**, 424-435 (2012).
- 1099 45. J. O. Korbel, P. J. Campbell, Criteria for inference of chromothripsis in cancer genomes.  
1100 *Cell* **152**, 1226-1236 (2013).
- 1101 46. F. Zhang *et al.*, The DNA replication FoSTeS/MMBIR mechanism can generate  
1102 genomic, genic and exonic complex rearrangements in humans. *Nat Genet* **41**, 849-853  
1103 (2009).
- 1104 47. R. P. Anand *et al.*, Chromosome rearrangements via template switching between  
1105 diverged repeated sequences. *Genes Dev* **28**, 2394-2406 (2014).
- 1106 48. T. J. Mitchell *et al.*, Timing the Landmark Events in the Evolution of Clear Cell Renal  
1107 Cell Cancer: TRACERx Renal. *Cell* **173**, 611-623 e617 (2018).
- 1108 49. L. Costantino *et al.*, Break-induced replication repair of damaged forks induces genomic  
1109 duplications in human cells. *Science* **343**, 88-91 (2014).
- 1110 50. J. Kramara, B. Osia, A. Malkova, Break-Induced Replication: The Where, The Why, and  
1111 The How. *Trends Genet* **34**, 518-531 (2018).
- 1112 51. L. Deng *et al.*, Mitotic CDK Promotes Replisome Disassembly, Fork Breakage, and  
1113 Complex DNA Rearrangements. *Mol Cell* **73**, 915-929 e916 (2019).
- 1114 52. R. Bhowmick, I. D. Hickson, The "enemies within": regions of the genome that are  
1115 inherently difficult to replicate. *F1000Res* **6**, 666 (2017).
- 1116 53. M. Soto, I. Garcia-Santisteban, L. Krenning, R. H. Medema, J. A. Raaijmakers,  
1117 Chromosomes trapped in micronuclei are liable to segregation errors. *J Cell Sci* **131**,  
1118 (2018).
- 1119 54. D. Fachinetti *et al.*, A two-step mechanism for epigenetic specification of centromere  
1120 identity and function. *Nat Cell Biol* **15**, 1056-1066 (2013).

- 1121 55. S. Z. Swartz *et al.*, Quiescent Cells Actively Replenish CENP-A Nucleosomes to  
1122 Maintain Centromere Identity and Proliferative Potential. *Dev Cell* **51**, 35-48 e37 (2019).
- 1123 56. D. W. Garsed *et al.*, The architecture and evolution of cancer neochromosomes. *Cancer*  
1124 *Cell* **26**, 653-667 (2014).
- 1125 57. K. M. Stimpson *et al.*, Telomere disruption results in non-random formation of de novo  
1126 dicentric chromosomes involving acrocentric human chromosomes. *PLoS Genet* **6**,  
1127 (2010).
- 1128 58. D. K. Butler, Ribosomal DNA is a site of chromosome breakage in aneuploid strains of  
1129 *Neurospora*. *Genetics* **131**, 581-592 (1992).
- 1130 59. B. McClintock, The Behavior in Successive Nuclear Divisions of a Chromosome Broken  
1131 at Meiosis. *Proc Natl Acad Sci U S A* **25**, 405-416 (1939).
- 1132 60. B. McClintock, Spontaneous alterations in chromosome size and form in *Zea mays*. *Cold*  
1133 *Spring Harb Symp Quant Biol* **9**, 72-81 (1941).
- 1134 61. D. Choquet, D. P. Felsenfeld, M. P. Sheetz, Extracellular matrix rigidity causes  
1135 strengthening of integrin-cytoskeleton linkages. *Cell* **88**, 39-48 (1997).
- 1136 62. E. S. Schiffhauer *et al.*, Mechanoaccumulative Elements of the Mammalian Actin  
1137 Cytoskeleton. *Curr Biol* **26**, 1473-1479 (2016).
- 1138 63. D. Bensimon, A. J. Simon, V. V. Croquette, A. Bensimon, Stretching DNA with a  
1139 receding meniscus: Experiments and models. *Phys Rev Lett* **74**, 4754-4757 (1995).
- 1140 64. M. Grandbois, M. Beyer, M. Rief, H. Clausen-Schaumann, H. E. Gaub, How strong is a  
1141 covalent bond? *Science* **283**, 1727-1730 (1999).
- 1142 65. N. Q. Balaban *et al.*, Force and focal adhesion assembly: a close relationship studied  
1143 using elastic micropatterned substrates. *Nat Cell Biol* **3**, 466-472 (2001).
- 1144 66. O. du Roure *et al.*, Force mapping in epithelial cell migration. *Proc Natl Acad Sci U S A*  
1145 **102**, 2390-2395 (2005).
- 1146 67. J. L. Tan *et al.*, Cells lying on a bed of microneedles: an approach to isolate mechanical  
1147 force. *Proc Natl Acad Sci U S A* **100**, 1484-1489 (2003).
- 1148 68. M. L. Bennink *et al.*, Unfolding individual nucleosomes by stretching single chromatin  
1149 fibers with optical tweezers. *Nat Struct Biol* **8**, 606-610 (2001).
- 1150 69. C. M. Carvalho, J. R. Lupski, Mechanisms underlying structural variant formation in  
1151 genomic disorders. *Nat Rev Genet* **17**, 224-238 (2016).
- 1152 70. J. A. Wala *et al.*, SvABA: genome-wide detection of structural variants and indels by  
1153 local assembly. *Genome Res* **28**, 581-591 (2018).
- 1154 71. J. J. Lee *et al.*, Tracing Oncogene Rearrangements in the Mutational History of Lung  
1155 Adenocarcinoma. *Cell* **177**, 1842-1857 e1821 (2019).
- 1156 72. D. Zink, A. H. Fischer, J. A. Nickerson, Nuclear structure in cancer cells. *Nat Rev Cancer*  
1157 **4**, 677-687 (2004).
- 1158 73. T. A. Prokhorova, K. Mowrer, C. H. Gilbert, J. C. Walter, DNA replication of mitotic  
1159 chromatin in *Xenopus* egg extracts. *Proc Natl Acad Sci U S A* **100**, 13241-13246 (2003).
- 1160 74. S. C. West *et al.*, Resolution of Recombination Intermediates: Mechanisms and  
1161 Regulation. *Cold Spring Harb Symp Quant Biol* **80**, 103-109 (2015).
- 1162 75. S. Priego Moreno, R. M. Jones, D. Poovathumkadavil, S. Scaramuzza, A. Gambus,  
1163 Mitotic replisome disassembly depends on TRAIPI ubiquitin ligase activity. *Life Sci*  
1164 *Alliance* **2**, (2019).
- 1165 76. P. Ly *et al.*, Chromosome segregation errors generate a diverse spectrum of simple and  
1166 complex genomic rearrangements. *Nat Genet* **51**, 705-715 (2019).



- 1167 77. S. Henikoff, T. Furuyama, Epigenetic inheritance of centromeres. *Cold Spring Harb*  
1168 *Symp Quant Biol* **75**, 51-60 (2010).
- 1169 78. Y. Nechemia-Arbely, D. Fachinetti, D. W. Cleveland, Replicating centromeric  
1170 chromatin: spatial and temporal control of CENP-A assembly. *Exp Cell Res* **318**, 1353-  
1171 1360 (2012).
- 1172 79. L. R. Gehlen *et al.*, Nuclear geometry and rapid mitosis ensure asymmetric episome  
1173 segregation in yeast. *Curr Biol* **21**, 25-33 (2011).
- 1174 80. D. Deckbar *et al.*, Chromosome breakage after G2 checkpoint release. *J Cell Biol* **176**,  
1175 749-755 (2007).
- 1176 81. J. van den Berg *et al.*, A limited number of double-strand DNA breaks is sufficient to  
1177 delay cell cycle progression. *Nucleic Acids Res* **46**, 10132-10144 (2018).
- 1178 82. C. Ribeyre, D. Shore, Regulation of telomere addition at DNA double-strand breaks.  
1179 *Chromosoma* **122**, 159-173 (2013).
- 1180 83. R. L. Dilley *et al.*, Break-induced telomere synthesis underlies alternative telomere  
1181 maintenance. *Nature* **539**, 54-58 (2016).
- 1182 84. K. L. McKinley, I. M. Cheeseman, Large-Scale Analysis of CRISPR/Cas9 Cell-Cycle  
1183 Knockouts Reveals the Diversity of p53-Dependent Responses to Cell-Cycle Defects.  
1184 *Dev Cell* **40**, 405-420 e402 (2017).
- 1185 85. S. K. Wu *et al.*, Cortical F-actin stabilization generates apical-lateral patterns of  
1186 junctional contractility that integrate cells into epithelia. *Nat Cell Biol* **16**, 167-178  
1187 (2014).
- 1188 86. A. Chicas *et al.*, Dissecting the unique role of the retinoblastoma tumor suppressor during  
1189 cellular senescence. *Cancer Cell* **17**, 376-387 (2010).
- 1190 87. A. Montagnoli *et al.*, A Cdc7 kinase inhibitor restricts initiation of DNA replication and  
1191 has antitumor activity. *Nat Chem Biol* **4**, 357-365 (2008).
- 1192 88. A. Sakaue-Sawano *et al.*, Visualizing spatiotemporal dynamics of multicellular cell-cycle  
1193 progression. *Cell* **132**, 487-498 (2008).
- 1194 89. M. Lobrich, B. Rydberg, P. K. Cooper, Repair of x-ray-induced DNA double-strand  
1195 breaks in specific Not I restriction fragments in human fibroblasts: joining of correct and  
1196 incorrect ends. *Proc Natl Acad Sci U S A* **92**, 12050-12054 (1995).
- 1197 90. K. H. Miga, C. Eisenhart, W. J. Kent, Utilizing mapping targets of sequences  
1198 underrepresented in the reference assembly to reduce false positive alignments. *Nucleic*  
1199 *Acids Res* **43**, e133 (2015).
- 1200 91. C. Chen *et al.*, Single-cell whole-genome analyses by Linear Amplification via  
1201 Transposon Insertion (LIANTI). *Science* **356**, 189-194 (2017).
- 1202 92. R. W. Tourdot, C.-Z. Zhang, Whole Chromosome Haplotype Phasing from Long-Range  
1203 Sequencing. *bioRxiv*, 629337 (2019).
- 1204 93. M. D. Young *et al.*, Single-cell transcriptomes from human kidneys reveal the cellular  
1205 identity of renal tumors. *Science* **361**, 594-599 (2018).
- 1206 94. P. J. Campbell *et al.*, Identification of somatically acquired rearrangements in cancer  
1207 using genome-wide massively parallel paired-end sequencing. *Nat Genet* **40**, 722-729  
1208 (2008).
- 1209 95. H. Li, Minimap2: pairwise alignment for nucleotide sequences. *Bioinformatics* **34**, 3094-  
1210 3100 (2018).
- 1211

## Figure 1

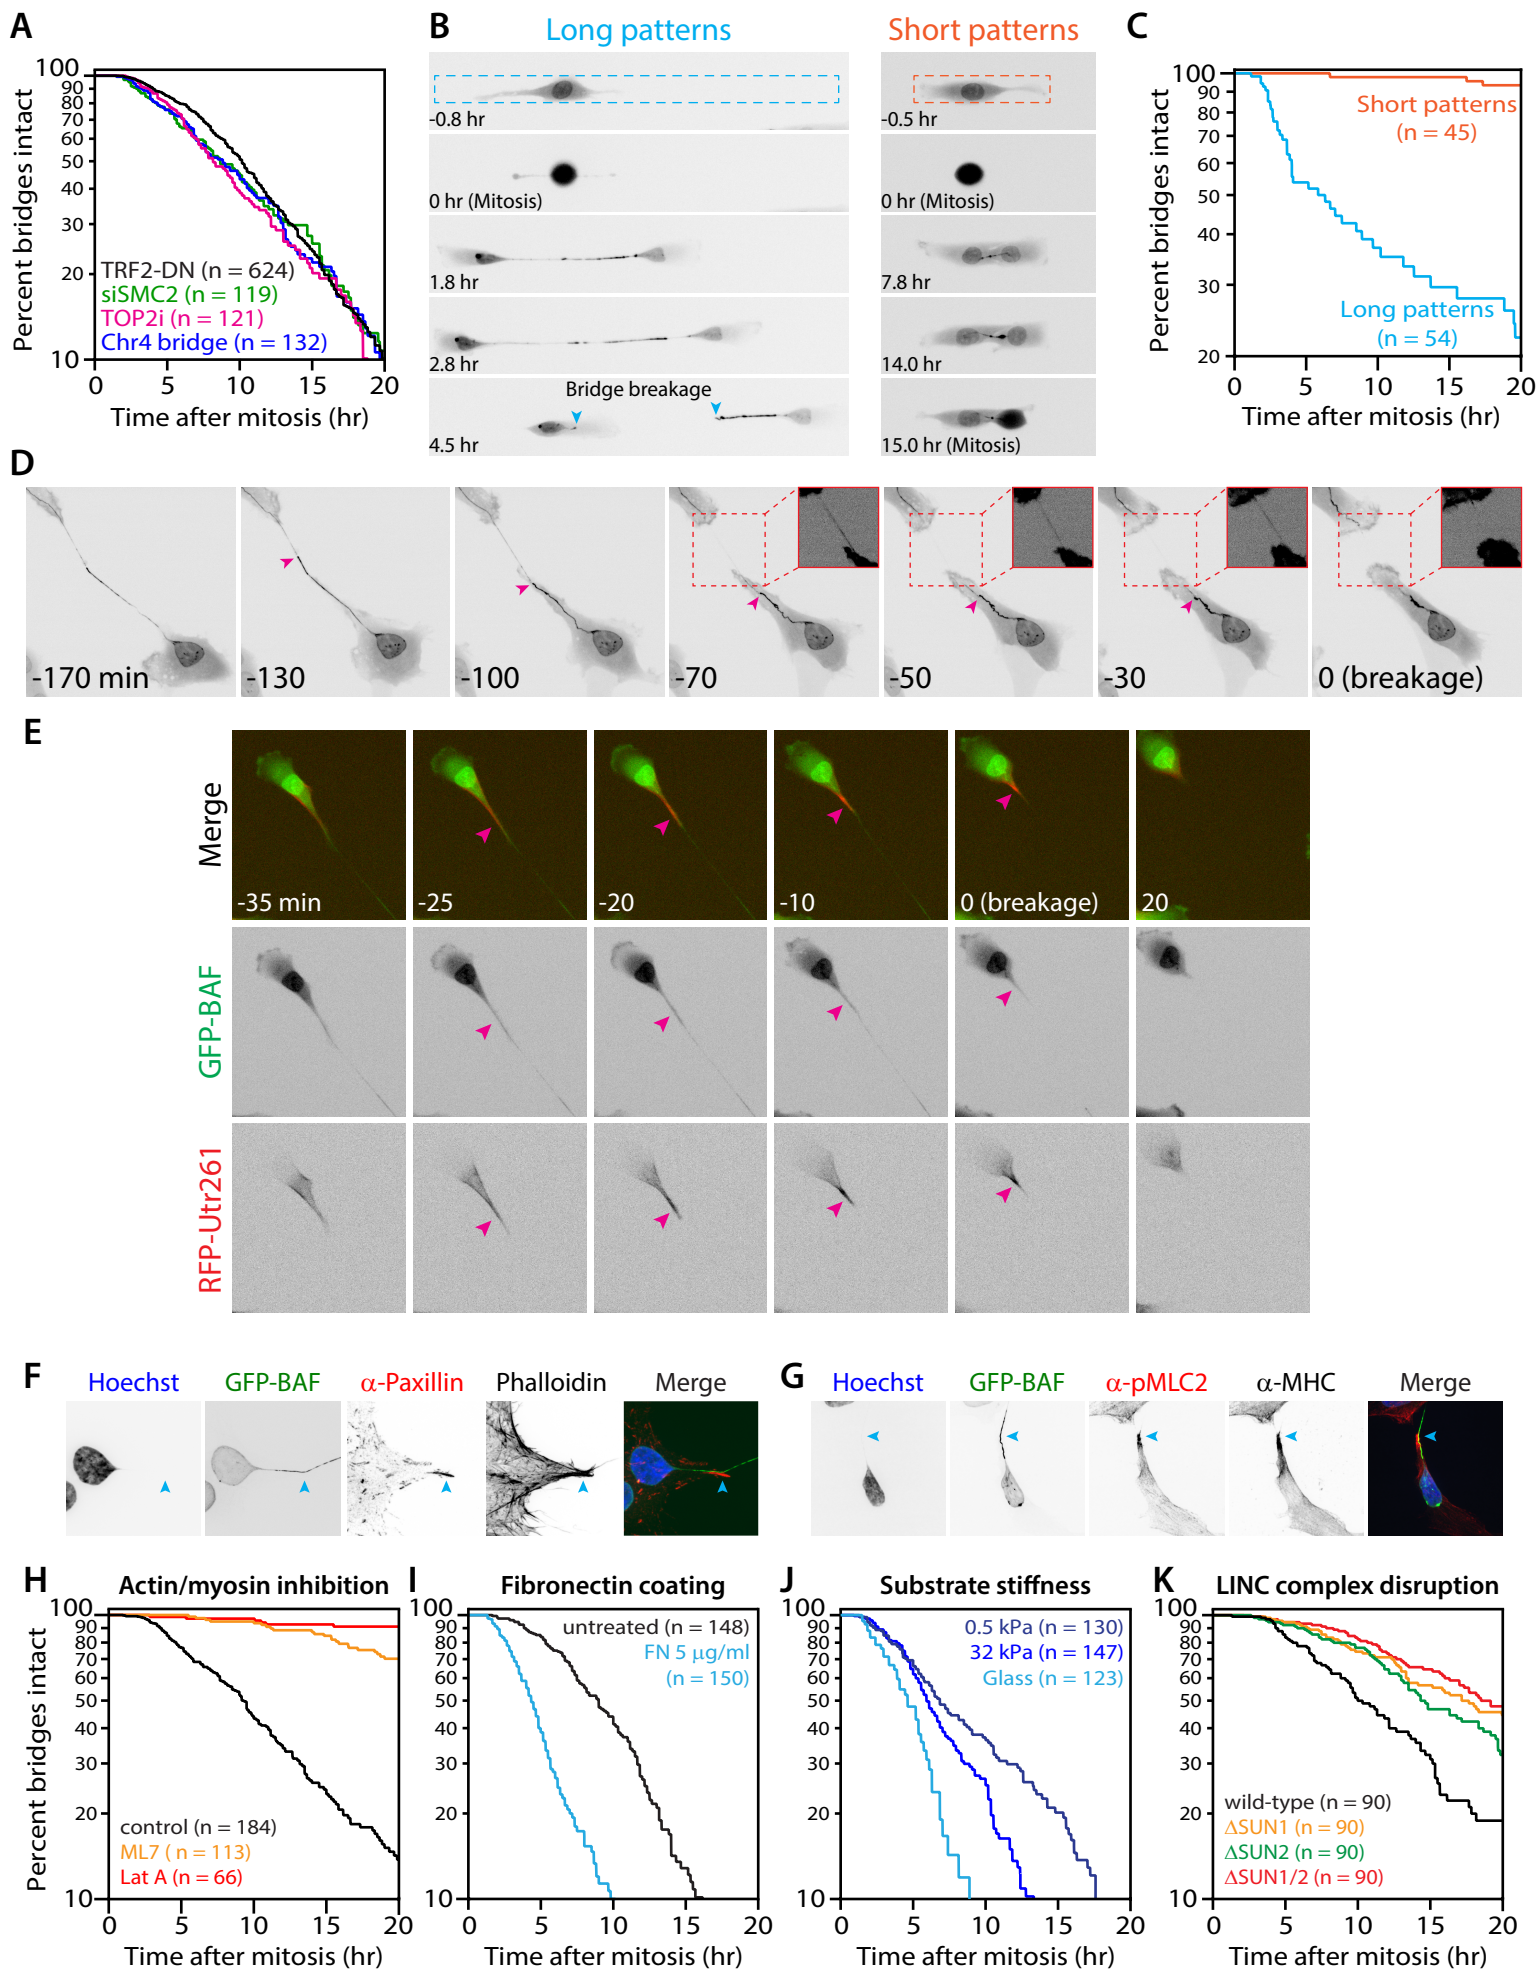

Figure 2

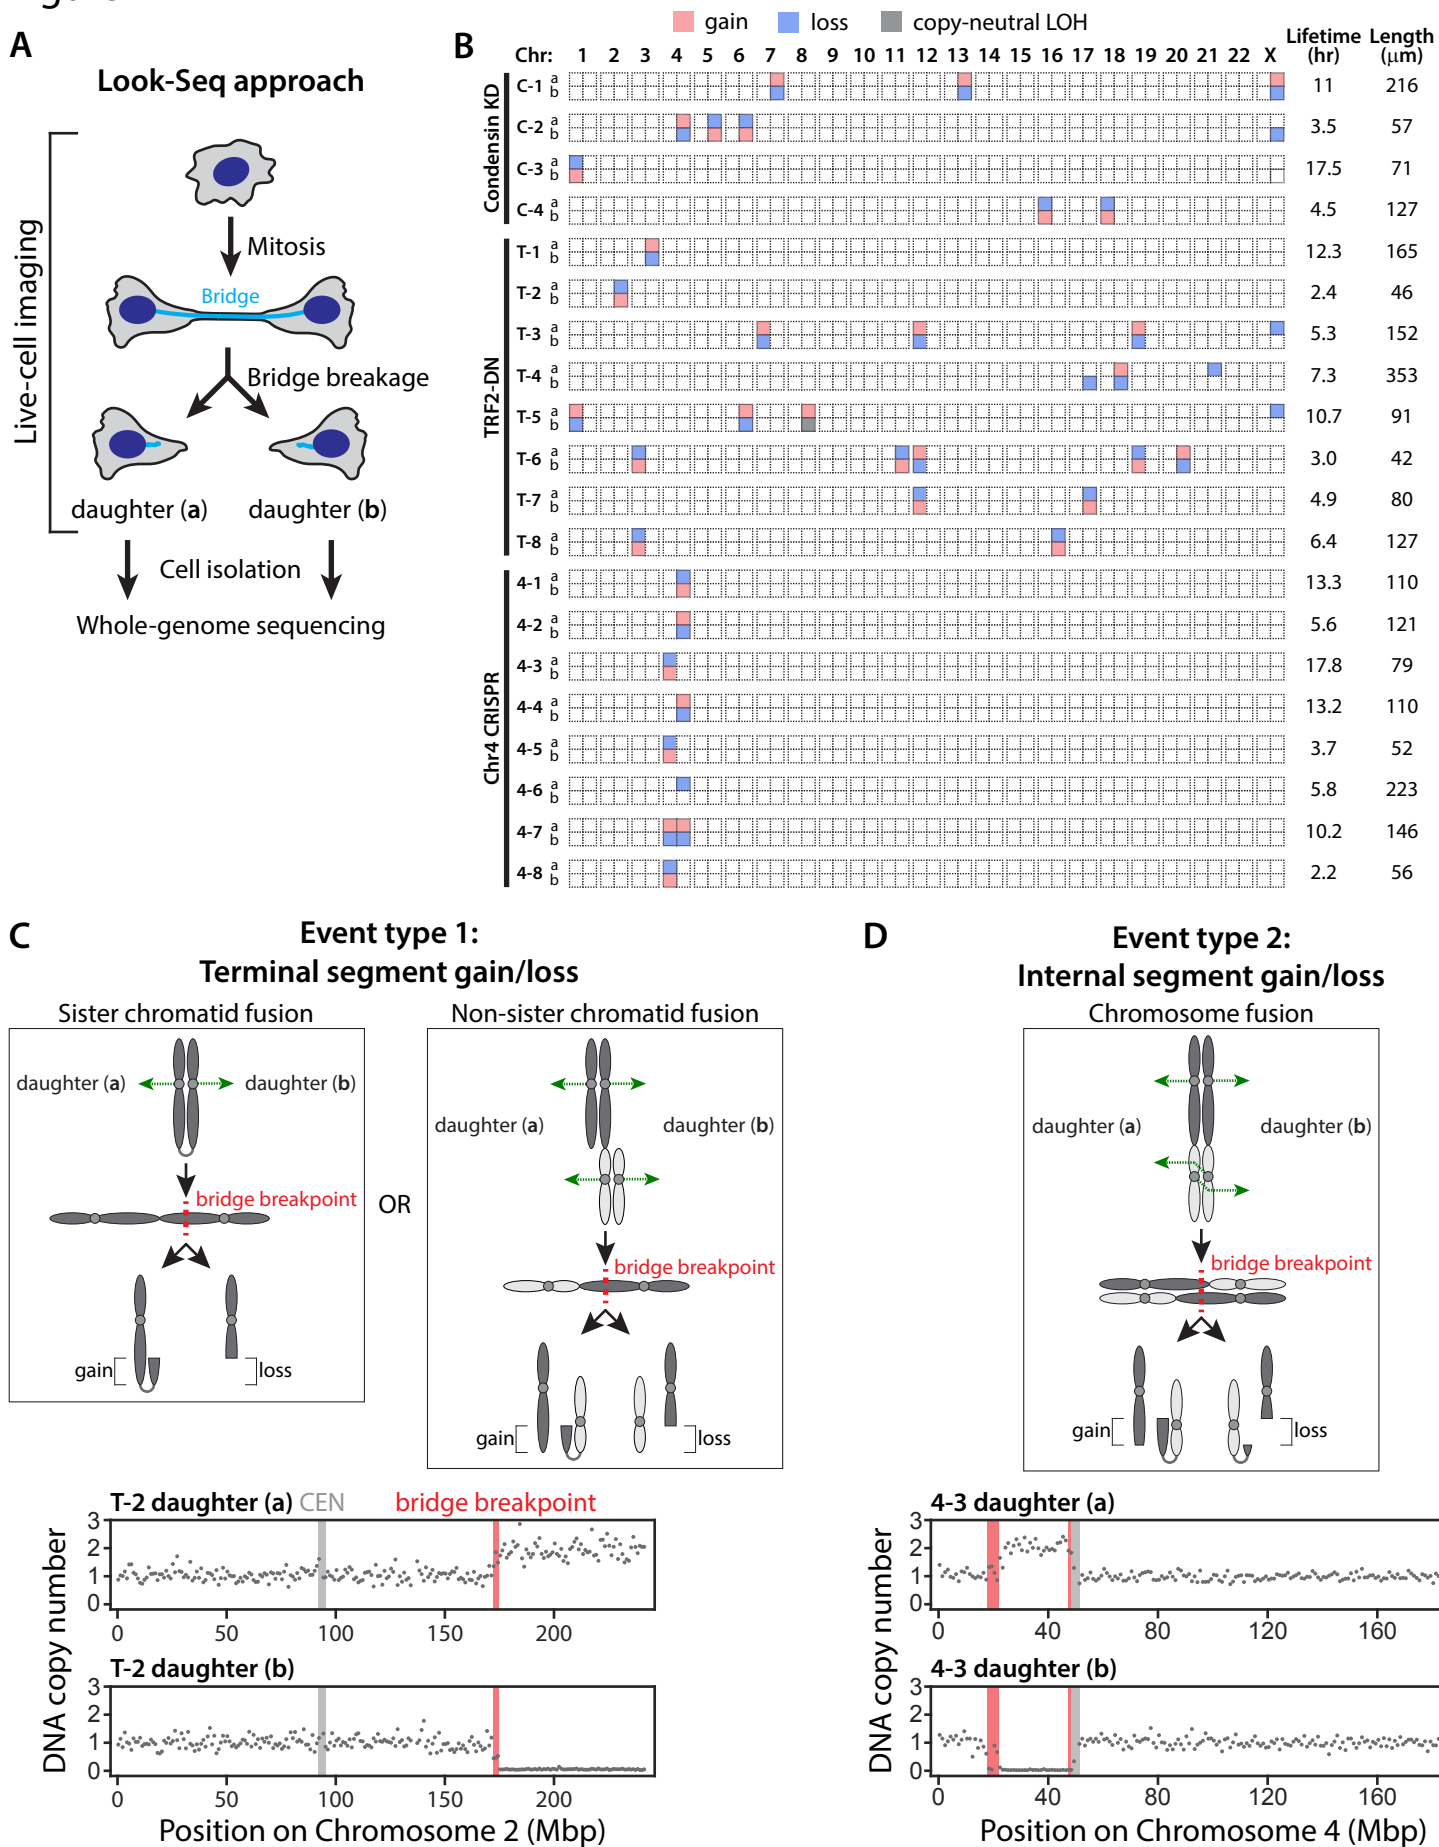

## Figure 3

### A Simple break

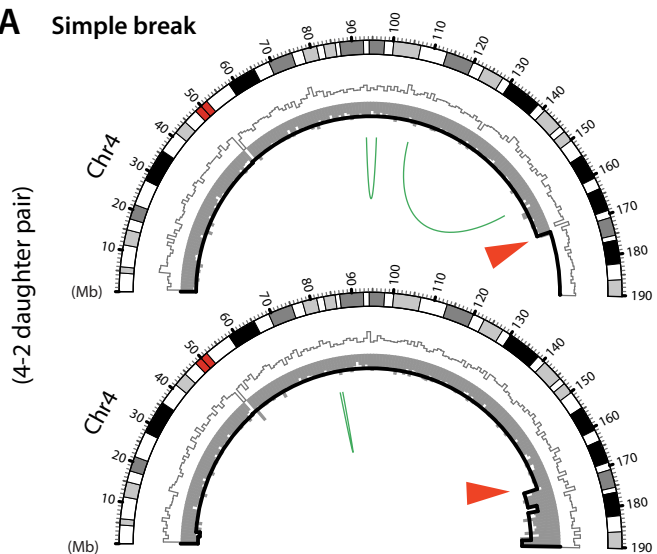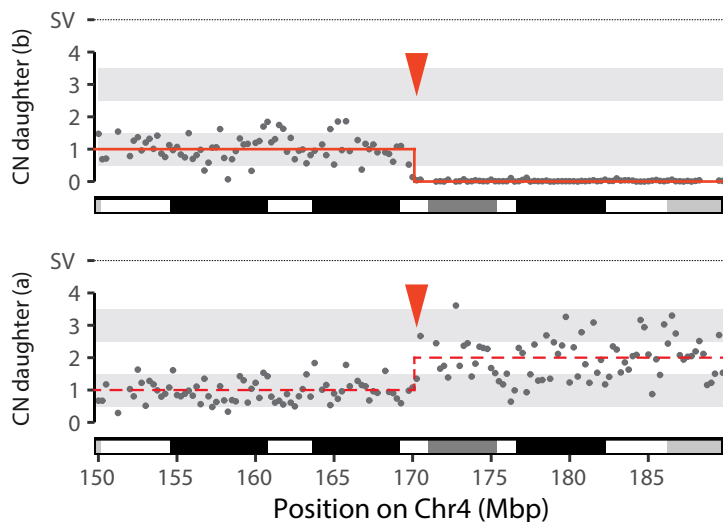

### B Local jump

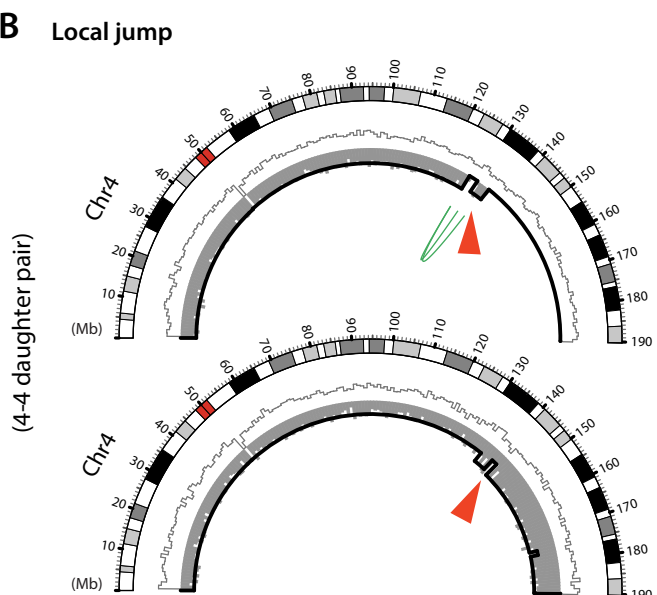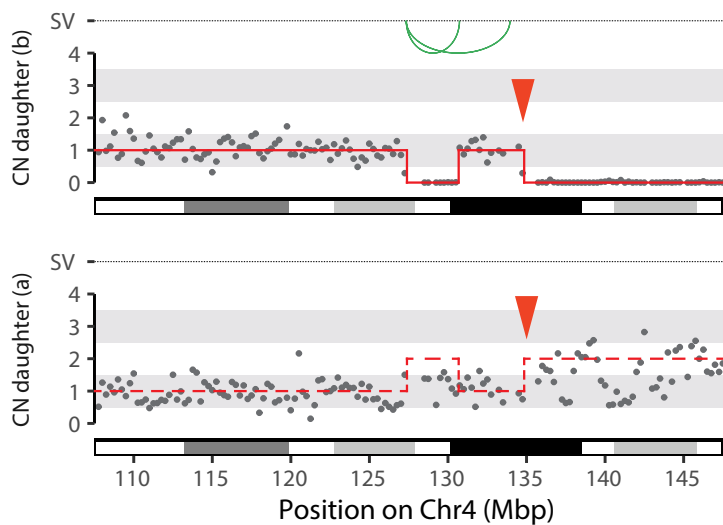

### C Fragmentation

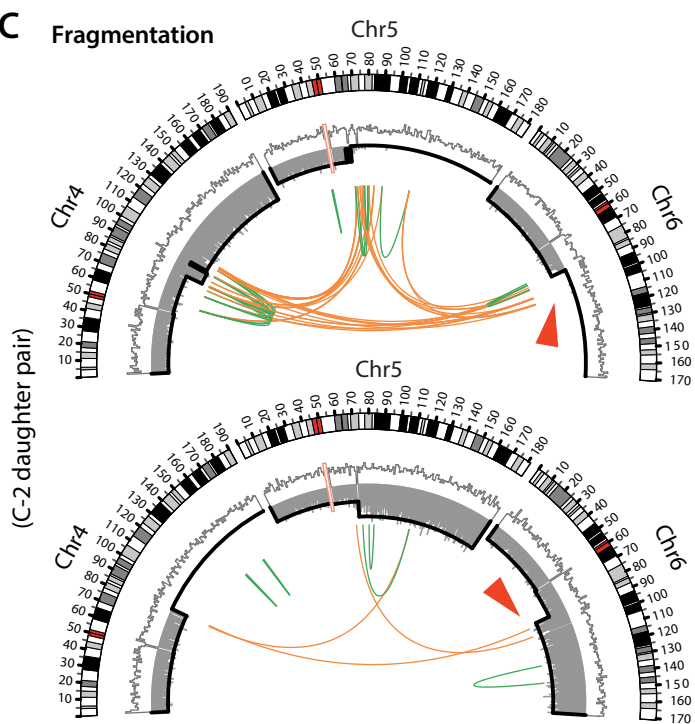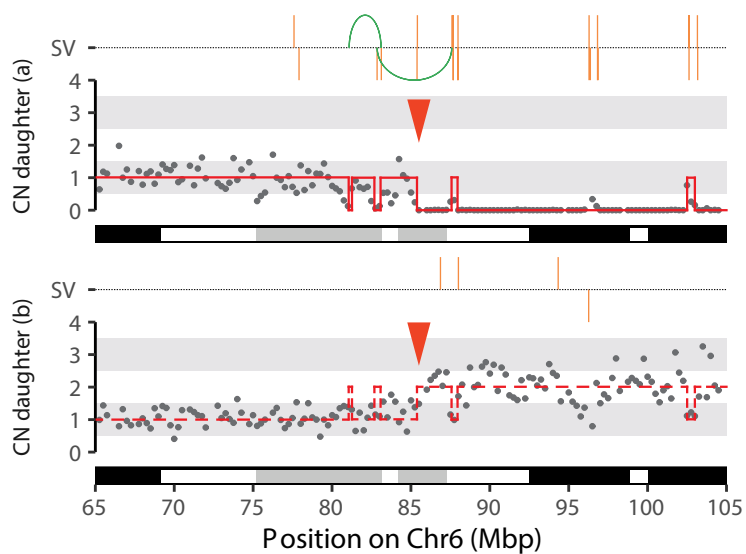

## Figure 4

### A Mechanical breakage

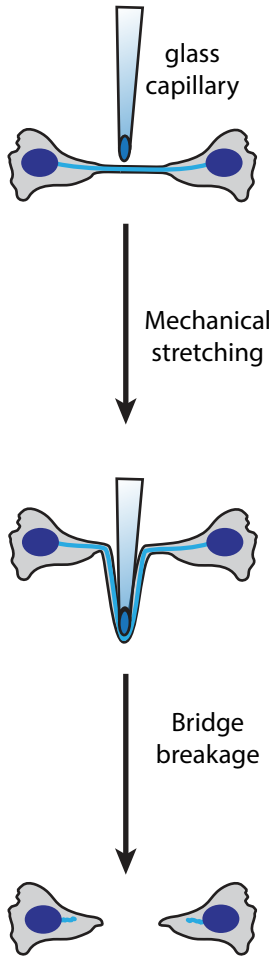

### Simple break

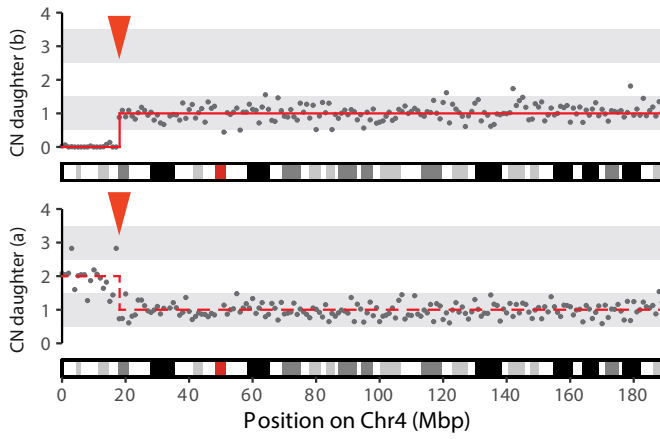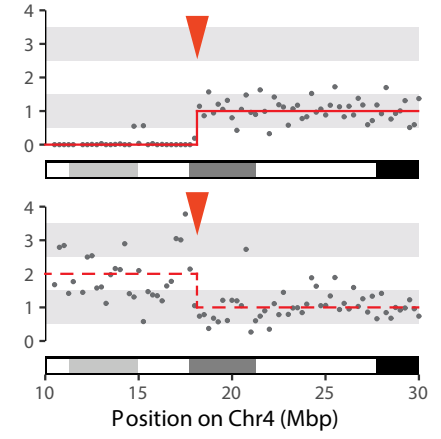

### Fragmentation

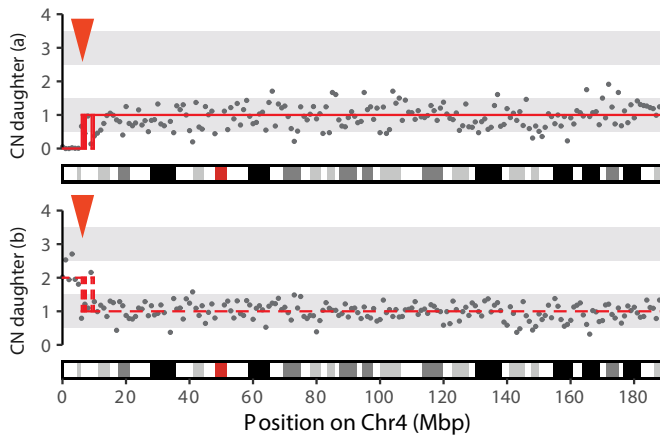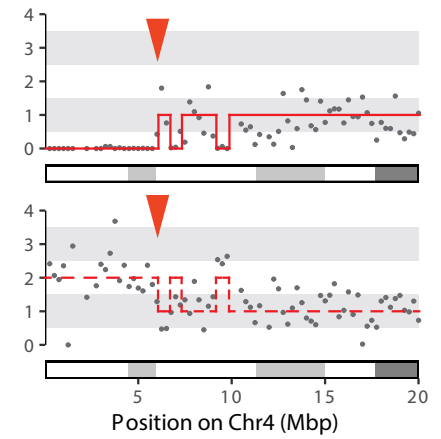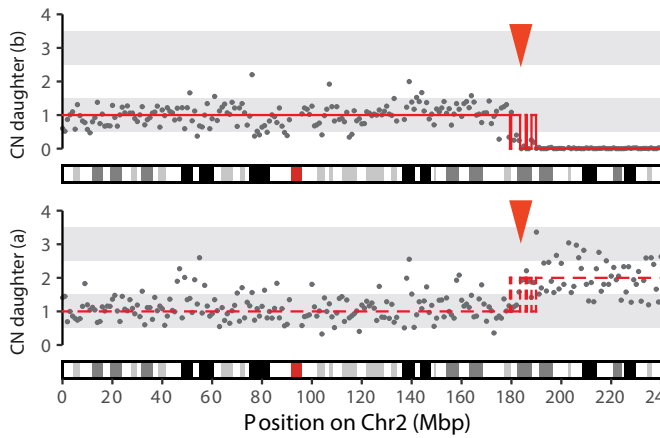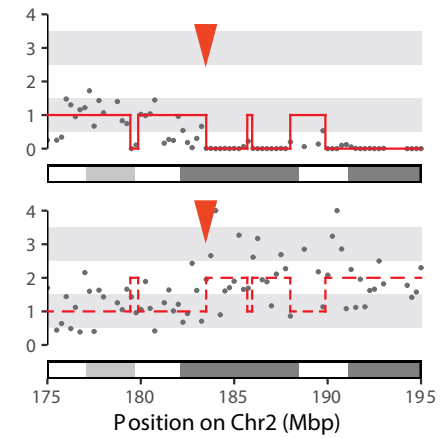

### B TREX1 null Simple break (TREX1-5 daughter pair)

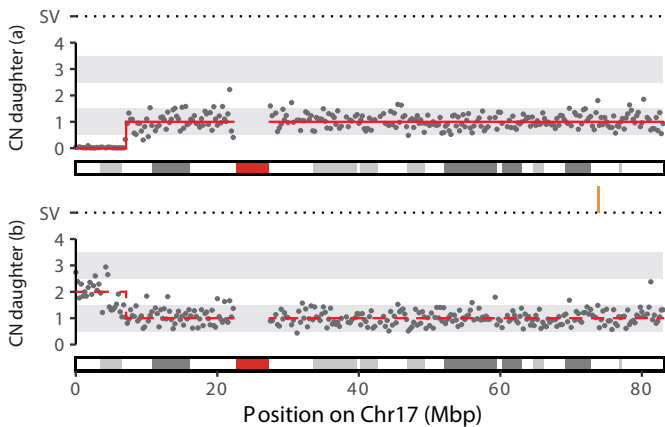

### Fragmentation (TREX1-1 daughter pair)

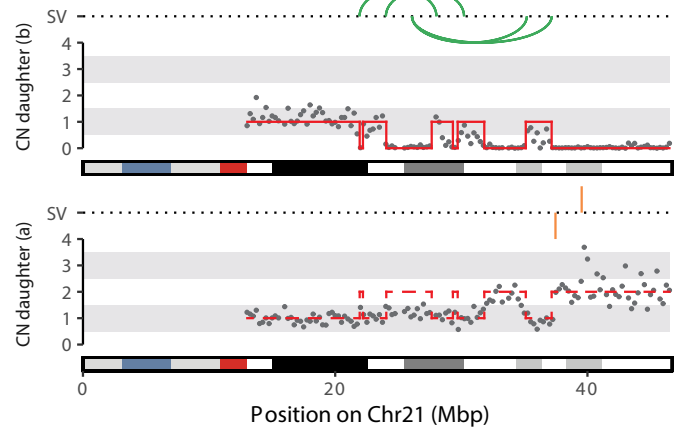

## Figure 5

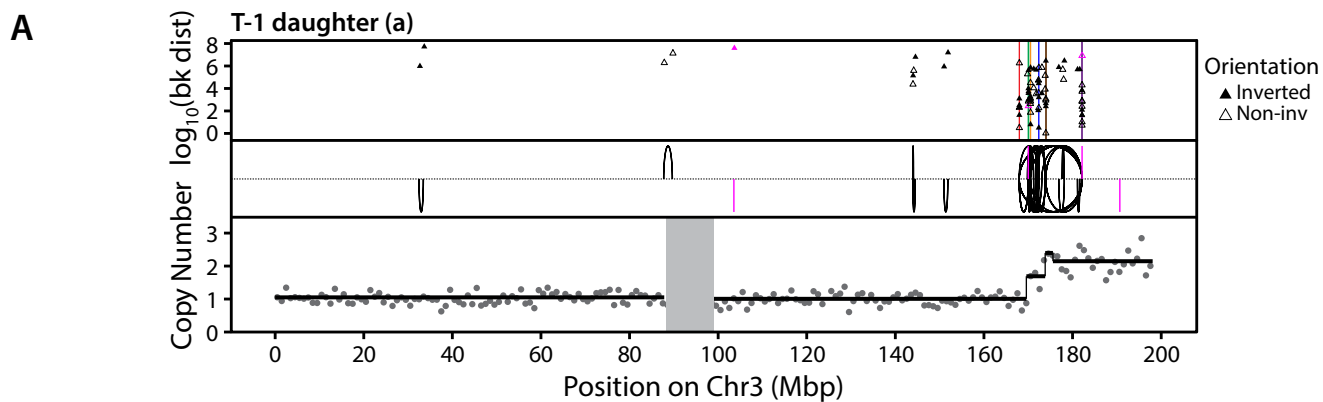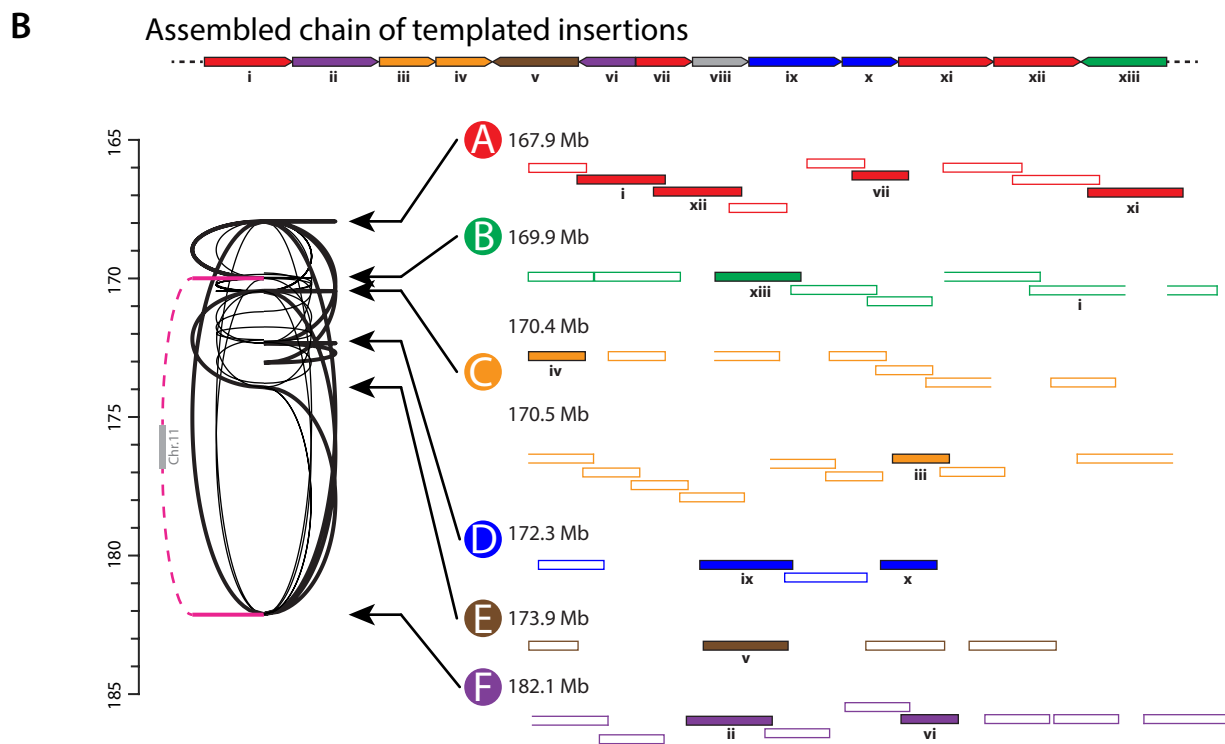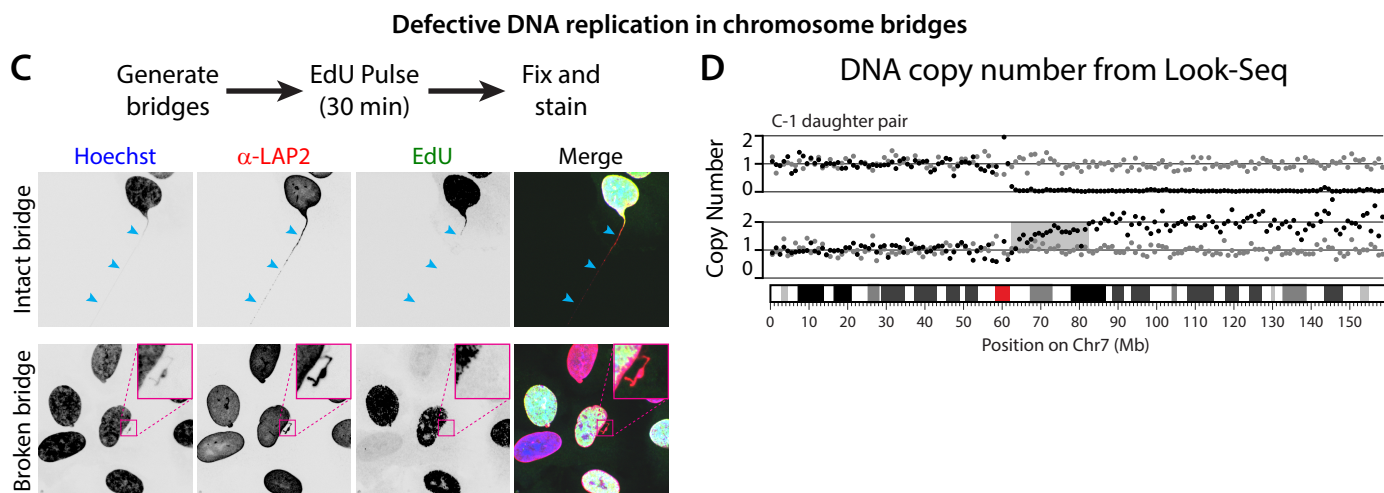

## Figure 6

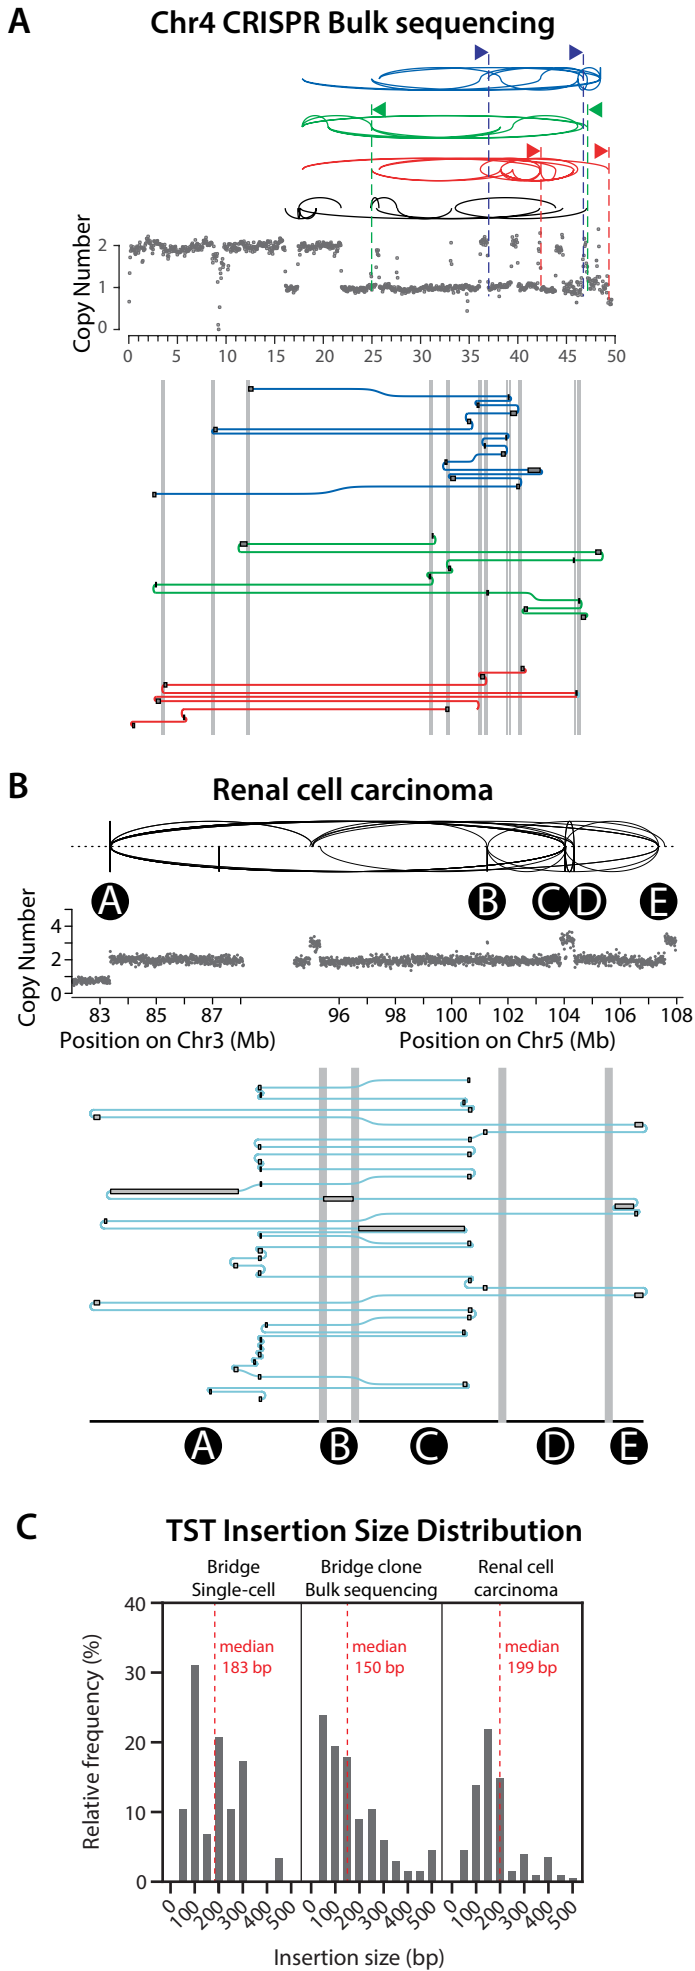

## Figure 7

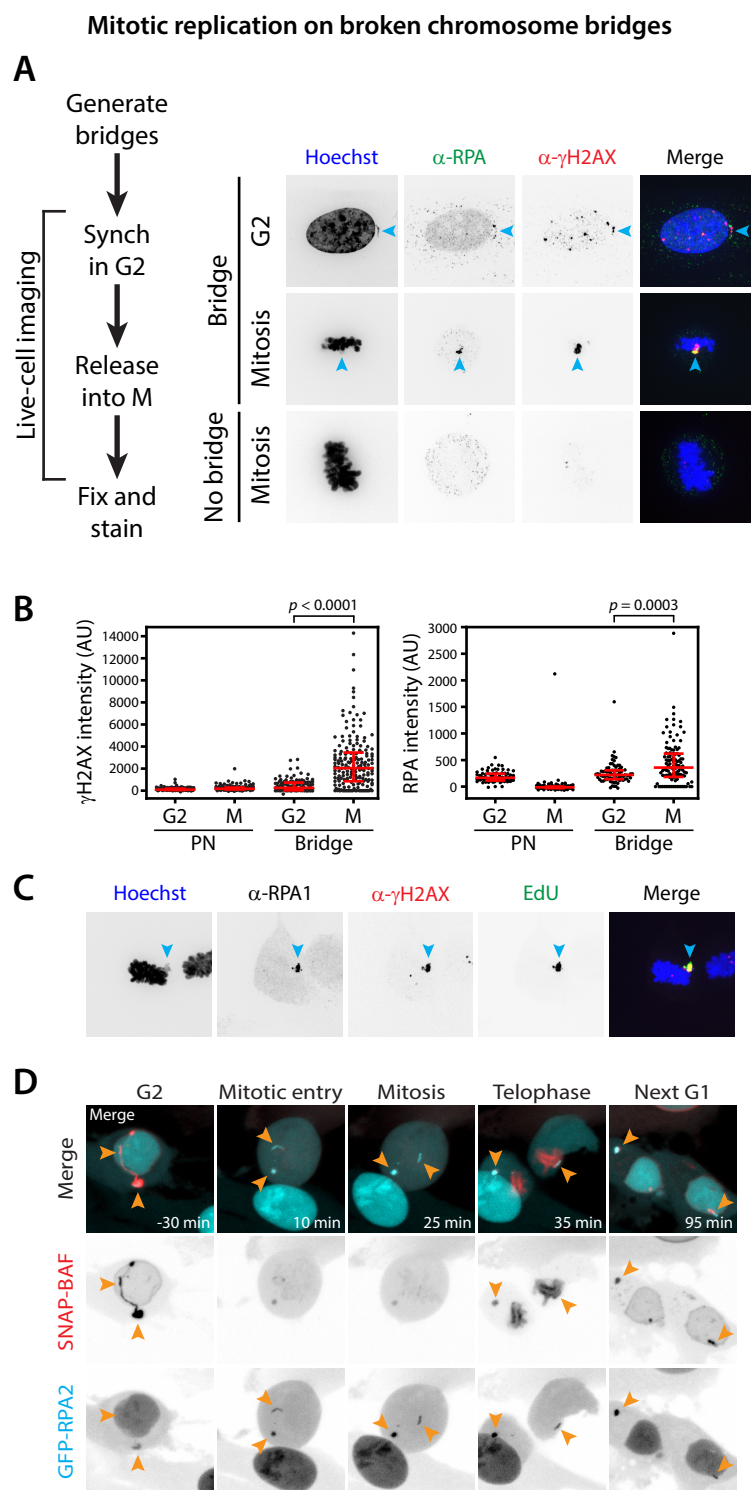



Figure 8

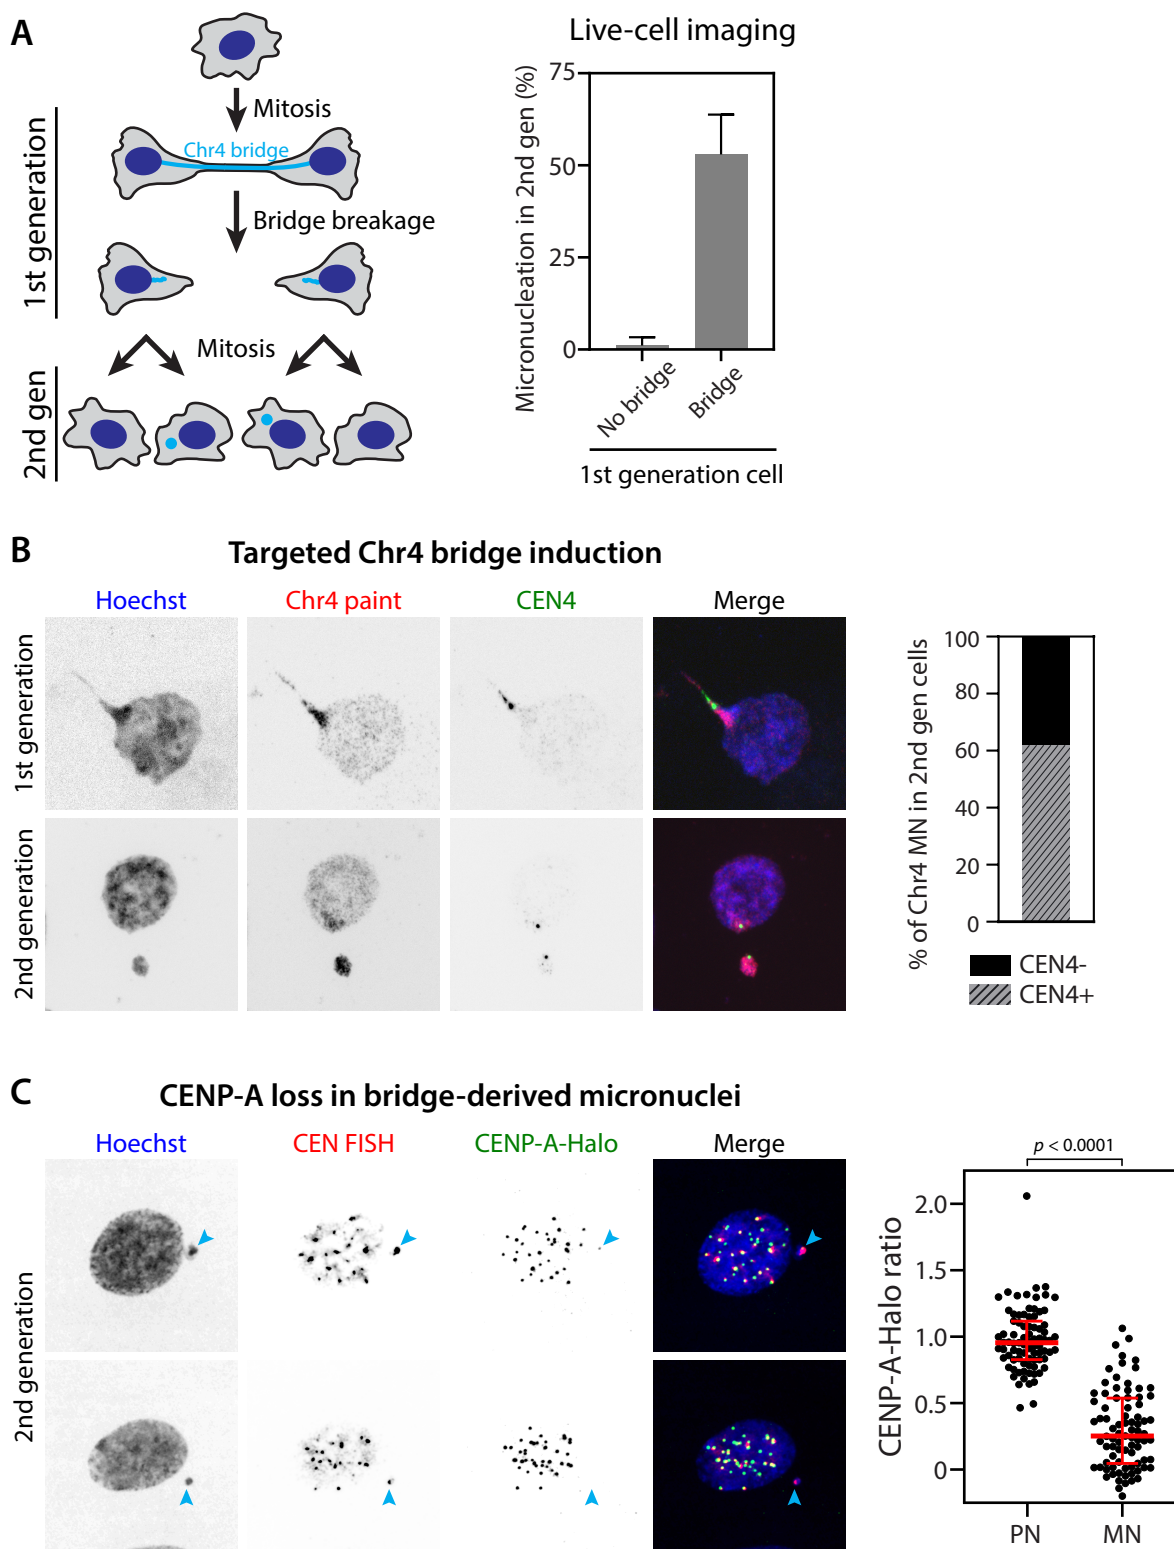

Figure 9

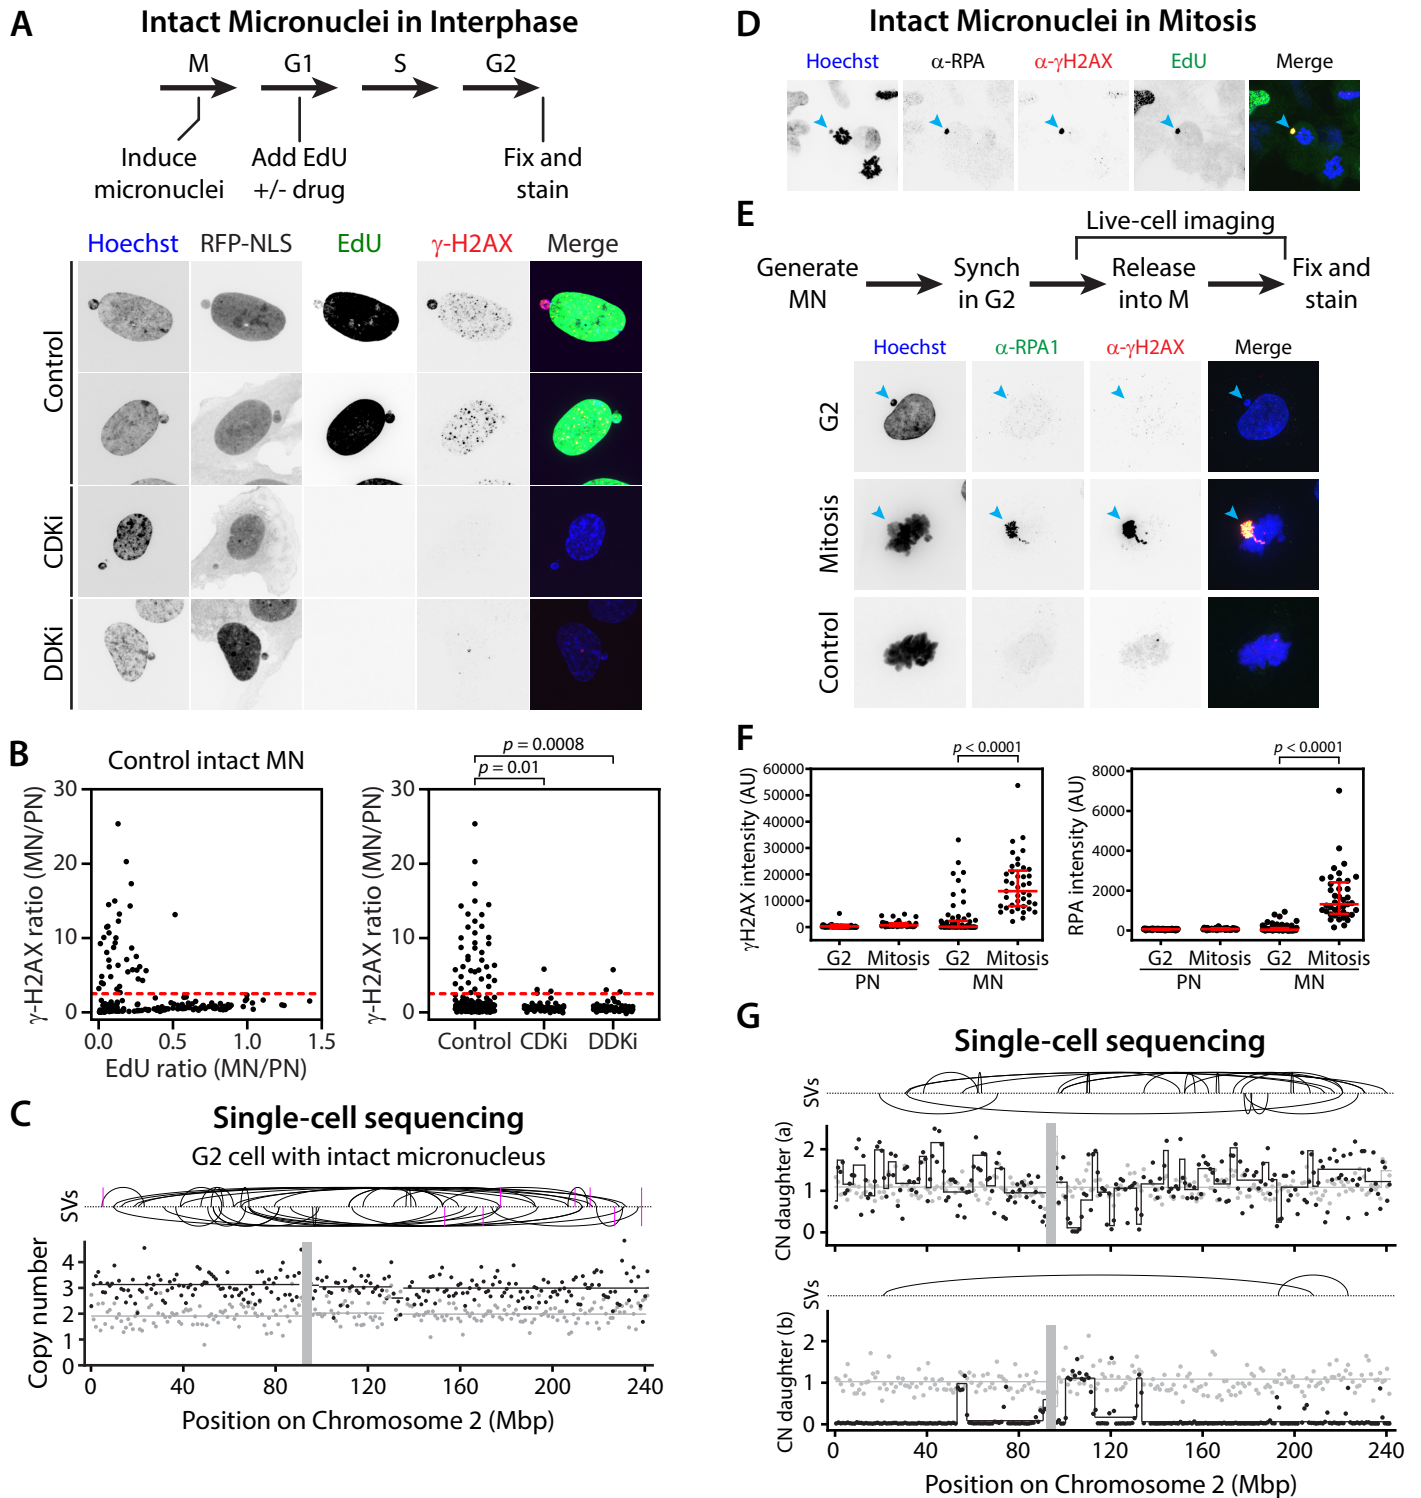

## Figure 10

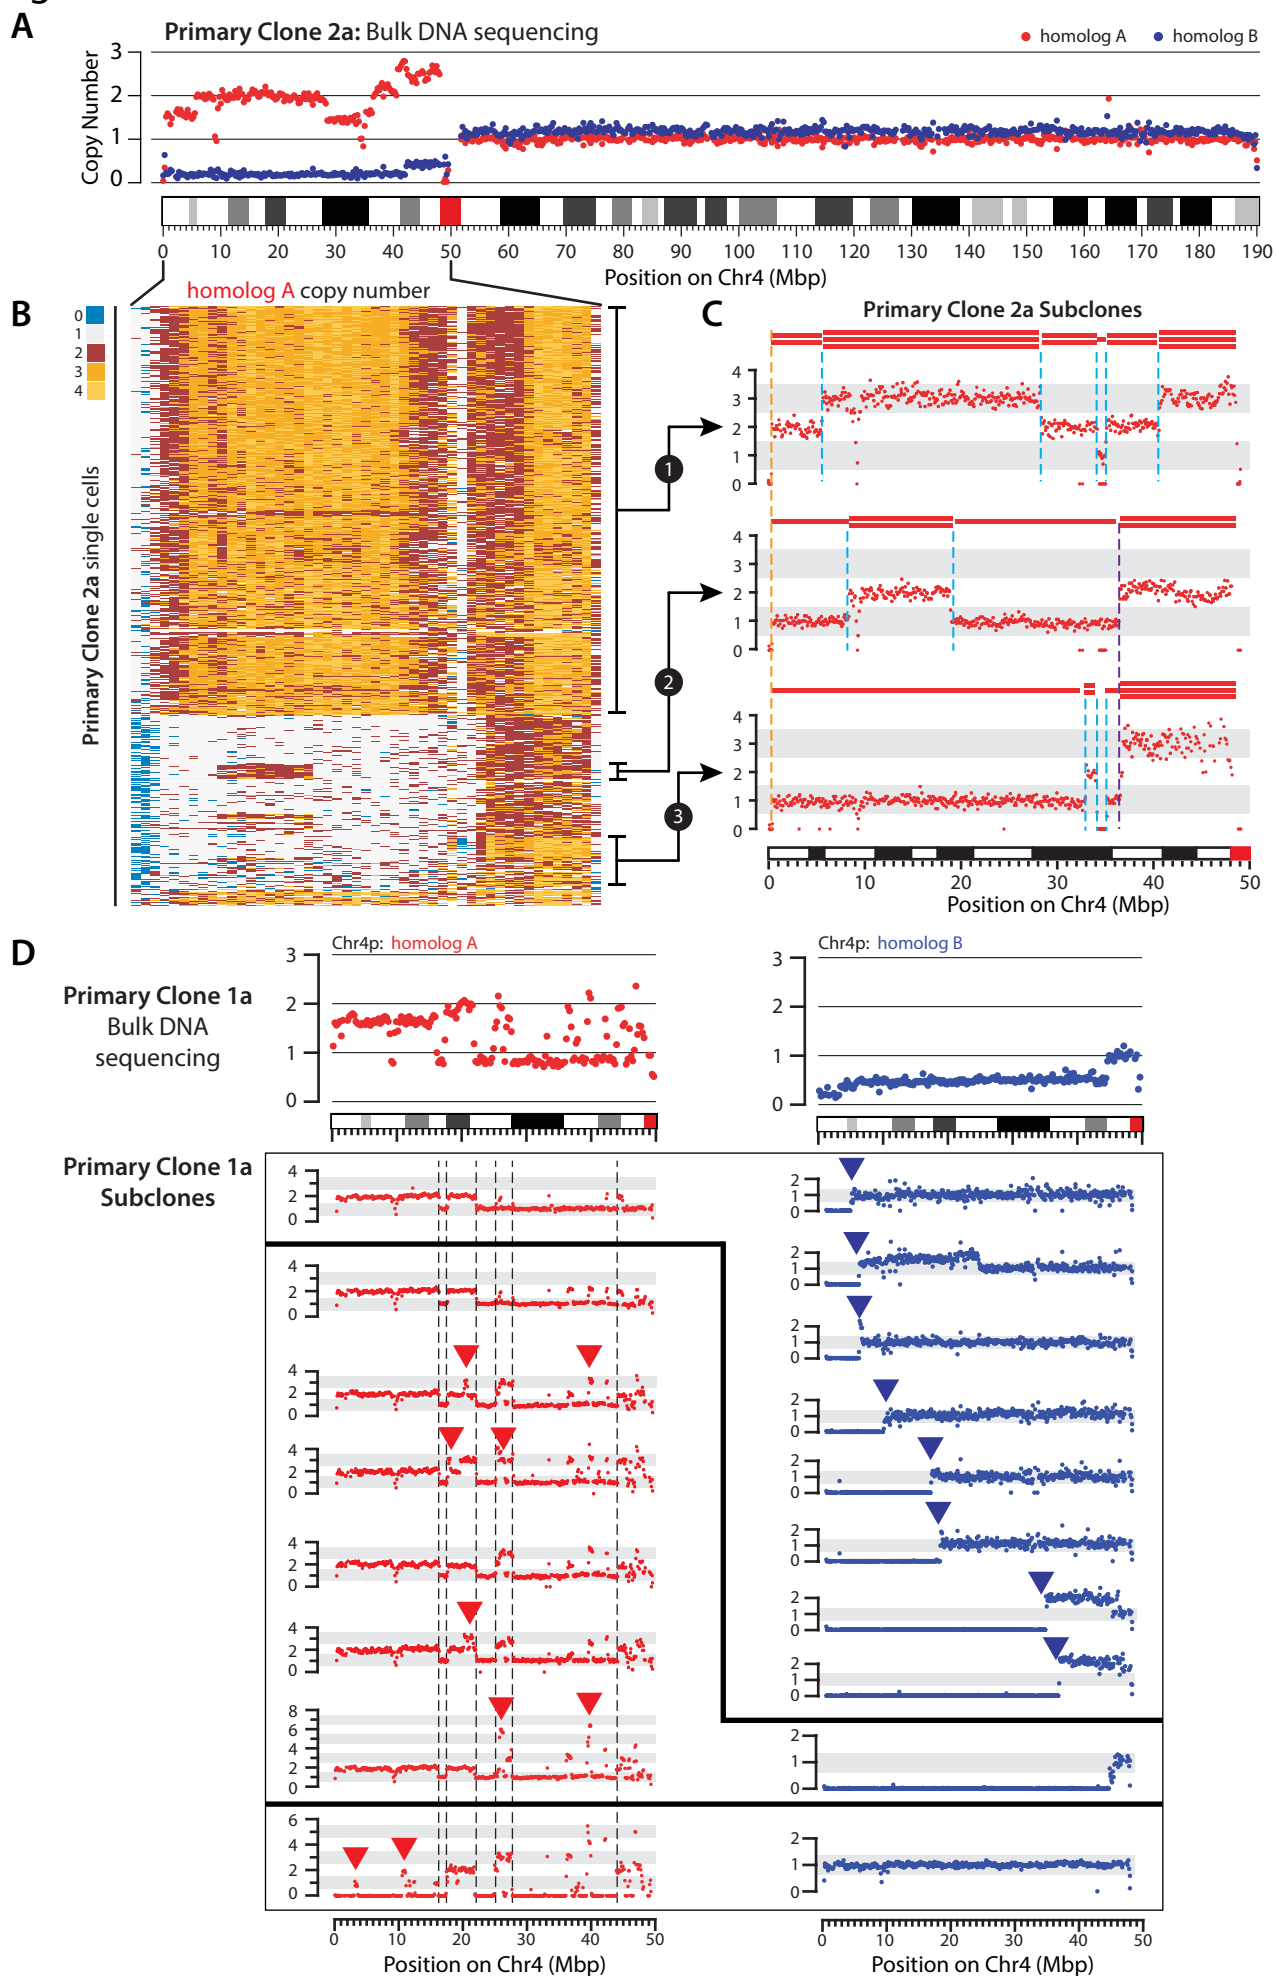

Source: https://www.biorxiv.org/content/10.1101/835058v1.full.pdf
